1 **Genome-wide strategies identify molecular niches regulated by connective tissue-**  
2 **associated transcription factors**

3 Mickael Orgeur<sup>1,2,3</sup>, Marvin Martens<sup>3</sup>, Georgeta Leonte<sup>2,4</sup>, Sonya Nassari<sup>3</sup>, Marie-Ange Bonnin<sup>3</sup>,  
4 Stefan T. Börno<sup>2</sup>, Bernd Timmermann<sup>2</sup>, Jochen Hecht<sup>2,5,6,7</sup>, Delphine Duprez<sup>3,\*,#</sup> and Sigmar  
5 Stricker<sup>1,2,\*,#</sup>.

6 <sup>1</sup> Institute of Chemistry and Biochemistry, Freie Universität Berlin, Berlin, Germany

7 <sup>2</sup> Max Planck Institute for Molecular Genetics, Berlin, Germany

8 <sup>3</sup> Sorbonne Universités, UPMC Univ. Paris 06, CNRS UMR 7622, Inserm U1156, IBPS-  
9 Developmental Biology Laboratory, 75005 Paris, France

10 <sup>4</sup> Institute of Biology, Freie Universität Berlin, Berlin, Germany

11 <sup>5</sup> Berlin-Brandenburg Center for Regenerative Therapies (BCRT), Charité Universitätsmedizin,  
12 Berlin, Germany

13 <sup>6</sup> Centre for Genomic Regulation (CRG), The Barcelona Institute for Science and Technology, Dr.  
14 Aiguader 88, 08003 Barcelona, Spain

15 <sup>7</sup> Universitat Pompeu Fabra (UPF), Barcelona, Spain

16 \* Equal contribution as senior authors

17 # Corresponding authors: Sigmar Stricker, [sigmar.stricker@fu-berlin.de](mailto:sigmar.stricker@fu-berlin.de); Delphine Duprez,  
18 [delphine.duprez@upmc.fr](mailto:delphine.duprez@upmc.fr)

## 19 **Keywords**

20 Chick, limb development, connective tissue differentiation, transcription factors, ChIP-seq, RNA-  
21 seq, transcriptional regulatory network, signalling pathways, extracellular matrix.

22

## 23 **List of abbreviations**

24 3F, triple-FLAG; chMM, chick micromass; CDS, coding sequence; ChIP-seq, chromatin  
25 immunoprecipitation followed by massively parallel DNA sequencing; CT, connective tissue; DE,  
26 differentially expressed; ECM, extracellular matrix; FDR, false-discovery rate; GO, gene ontology;  
27 IDR, irreproducibility discovery rate; padj, Benjamini-Hochberg adjusted p-value; PCA, principal  
28 components analysis; rlog, regularized logarithm; RNA-seq, whole-transcriptome sequencing; TF,  
29 transcription factor; TFBS, transcription factor binding sites; TPM, transcripts per million; TSS,  
30 transcriptional start site.

## 31 **Abstract**

## 32 **Background**

33 Connective tissues support, connect and separate tissues and organs, playing crucial roles in  
34 development, homeostasis and fibrosis. Cell specification and differentiation is triggered by the  
35 activity of specific transcription factors. While key transcription factors have been identified for  
36 differentiation processes of most tissues, connective tissue differentiation remains largely unstudied.

## 37 **Results**

38 To gain insight into the regulatory cascades involved in connective tissue differentiation, we selected  
39 five zinc finger transcription factors - OSR1, OSR2, EGR1, KLF2 and KLF4 - based on their  
40 expression patterns and/or known involvement in the differentiation of mesenchymal cells into  
41 connective tissue subtypes. We combined RNA-seq with ChIP-seq profiling in chick limb cells  
42 following overexpression of individual transcription factors. We identified a set of common genes  
43 regulated by all five transcription factors, which constitutes a connective tissue core expression set.  
44 This common core was enriched in genes associated with axon guidance and myofibroblast signature.  
45 In addition, each of the transcription factors regulated a different set of extracellular matrix  
46 components and signalling molecules, which define local molecular niches important for connective  
47 tissue development and function.

## 48 **Conclusions**

49 The established regulatory network identifies common and distinct molecular signatures downstream  
50 of five connective tissue-associated transcription factors and provides insight into the signalling  
51 pathways governing limb connective tissue differentiation. It also suggests a concept whereby local  
52 molecular niches can be created via the expression of specific transcription factors impinging on the  
53 specification of microenvironments.

## 54 **Background**

55 All cells in a multicellular eukaryotic organism share the same genetic information. However, the  
56 choice of specification, differentiation and function taken by a progenitor cell encompasses dramatic  
57 transcriptional and finally phenotypic changes that differ for each cell/tissue type. Lineage-specific  
58 genetic programs consist in a fine-tuning between the repression and the expression of a given set of  
59 genes in response to extrinsic and intrinsic signals at a specific location and/or at a precise time [1].  
60 Progenitor cells are specified and induced to differentiate along a certain lineage upon activation of  
61 lineage-specific key transcription factors (TFs) that drive specific transcriptional programs [2]. As a  
62 consequence, the differentiating progenitor cells express lineage-specific genes that reinforce lineage  
63 commitment, as well as providing unique characteristics to the specific cell type and the tissue it gives  
64 rise to.

65 Connective tissue (CT) is one of the main components of the body supporting tissues and organs. The  
66 term of CT gathers together an ensemble of tissues such as specialized CT (cartilage and bone), soft  
67 CT (adipose tissue and vasculature) and dense CT. Dense CT can be divided into regular CT (tendon  
68 and ligament) and irregular CT (loose CT surrounding or within organs such as muscle CT) [3].  
69 Regular and irregular CTs are part of the musculoskeletal system and are associated with  
70 cartilage/bone and skeletal muscle. Dysregulation of CT homeostasis leads to fibrosis, which is  
71 observed during pathological tissue repair or healing processes and in cancer [4]. Although fibrosis  
72 is a common research subject, normal CT formation during development remains to date poorly  
73 investigated.

74 The appendage of vertebrate embryos is an excellent model system for analysing tissue differentiation  
75 and cellular interactions during development. In limbs, cells forming the skeleton, as well as regular  
76 and irregular CTs, are derived from the lateral plate mesoderm, while myogenic cells originate from  
77 the somites [5,6]. Classical embryological experiments have shown that limb patterning is dependent  
78 on lateral plate-derived CTs that provide instructive cues to guarantee correct muscle, nerve and  
79 vessel formation [7–10]. This indicates that CT cells are key players creating local



80 microenvironments that contain permissive and/or instructive cues for organ patterning. While master  
81 TFs governing cell-type specific gene expression programs have been identified for cartilage (SOX5,  
82 SOX6, SOX9), bone (OSX, RUNX2) and muscle (MYF5, MYF6, MYOD) development [11,12],  
83 knowledge is sparse for dense CT. CT is mostly identified by gene/protein expression associated with  
84 CT function. Irregular CT is associated with type-III and -VI collagens, while regular CT  
85 (tendon/ligament) is characterized by the expression of structural and functional components such as  
86 type-I and -XII collagens and Tenomodulin (TNMD) [7,13]. Few TFs specific for CT lineages have  
87 been identified. Scleraxis (SCX) is to date the unique marker for tendon progenitors, however it is  
88 not necessary for development of most tendons [14,15]. Early growth response 1 (EGR1) is also not  
89 required for mouse tendon development but is involved in type-I collagen production in chick and  
90 mouse developing tendons [16]. Moreover, EGR1 forced expression is sufficient to induce the  
91 expression of tendon-associated genes in murine mesenchymal stem cells [17]. Limb irregular CT  
92 associated with muscle is marked by the expression of TCF4 (TCF7l2), TBX4 or TBX5, but they  
93 have no obvious role in CT differentiation [18,19]. In contrast, Odd-skipped related 1 and 2 (OSR1  
94 and OSR2) are expressed and involved in loose irregular CT differentiation during chick and mouse  
95 limb development [20,21, Vallecillo Garcia et al. in revision].

96 Here, we analysed the molecular mechanisms underlying CT differentiation and function during  
97 chick limb development, in order to provide a framework for future analyses of CT development and  
98 CT-muscle interconnectivity. To this end, we selected five zinc finger TFs involved or presumably  
99 involved in CT differentiation. OSR1, OSR2 and EGR1 were chosen based on their demonstrated  
100 contribution in irregular and regular CT development, respectively. KLF2 and KLF4 (Krüppel-like  
101 factor 2 and 4) were chosen based on their expression patterns in CT associated with tendons,  
102 although their role in limb development is presently not elucidated. We combined whole-  
103 transcriptome sequencing (RNA-seq) and chromatin immunoprecipitation followed by massively  
104 parallel DNA sequencing (ChIP-seq) to identify the gene regulatory programs downstream of each  
105 TF. This allowed us to design a novel, unique and unexplored global regulatory network underlying

106 CT differentiation and to identify common and specific molecular niches that are shaped during this  
107 process.

## 108 **Results**

### 109 **Limb expression patterns of CT-associated TFs**

110 We investigated gene expression patterns of the five selected CT-associated TFs in chick limbs during  
111 development. Consistent with previous observations [20,21], *OSR1* and *OSR2* were expressed in  
112 dorsal and ventral limb regions of E4.5 chick embryos (Fig. 1a, b). *OSR1* and *OSR2* expression  
113 domains overlapped with those of *SCX* and *MYOD*, which labelled tendon and myogenic cells,  
114 respectively (Fig. 1c, d). In contrast to both *OSR* transcripts, *EGR1*, *KLF2* and *KLF4* were not  
115 detected in E4.5 limb buds. At later stages of limb development, when the initial pattern of the  
116 musculoskeletal system is set, both *OSR1* and *OSR2* were not expressed in *SCX*-positive tendons, but  
117 rather expressed in muscle CT, interstitial to muscle fibres, while *OSR1* was also detected surrounding  
118 individual muscles (Fig. 1e-i). *EGR1* was expressed in tendons, close to muscle attachments (Fig 1j,  
119 k), as previously described [16], while *KLF2* and *KLF4* transcripts delineated *SCX*-positive tendons  
120 of the knee of E9.5 chick embryos (Fig. 1l-q). In summary, *OSR1* and *OSR2* label irregular CT,  
121 whereas *EGR1*, *KLF2* and *KLF4* are expressed in different regions of regular CT in developing chick  
122 limbs.

123

### 124 **The selected TFs influence differentiation of limb mesenchymal cells**

125 To analyse the functionality of the five TFs towards CT differentiation, we chose the chick micromass  
126 (chMM) explant model (Fig. 2a). In this three-dimensional culture model, primary limb bud cells  
127 behave close to the in vivo situation and differentiate into the mesenchymal lineages observed in  
128 native limb buds [22]. We tested the ability of the five TFs to shift cell differentiation via their  
129 retroviral overexpression in chMM cultures. While the overall morphology of the chMM cultures  
130 remained unchanged across all conditions, cartilage differentiation was affected upon TF  
131 overexpression (Fig. 2b, c). In agreement with previous observations [21], *OSR1* and *OSR2*  
132 overexpression reduced chondrogenic matrix production by 58% and 67%, respectively, compared

133 to control cultures (Fig. 2c, d). Similarly, KLF2 and KLF4 overexpression induced a reduction of  
134 cartilage nodule formation, but to a lower extent compared to OSR1 and OSR2 (Fig. 2c, d). EGR1  
135 was the only factor that increased chondrogenic matrix production within the chMM cultures (Fig.  
136 2c, d). Quantitative RT-PCR analysis of transcript levels of cartilage-associated genes, *SOX9* and  
137 *COL2A1*, confirmed the inhibitory effect of OSR1, OSR2, KLF2 and KLF4 overexpression, as well  
138 as the positive effect of EGR1 overexpression on cartilage differentiation (Fig. 2e-g). EGR1  
139 overexpression increased the expression of the tendon differentiation marker, *TNMD*, while not  
140 affecting that of the irregular CT markers *COL3A1* and *COL6A1* (Fig. 2e). Overexpression of KLF2,  
141 but not that of KLF4, increased the expression levels of the tendon markers *SCX* and *TNMD* (Fig.  
142 2f). Both KLF factors also increased *COL6A1* expression (Fig. 2f). OSR2 overexpression increased  
143 the expression of the CT markers *COL3A1* and *COL6A1*, while OSR1 overexpression only affected  
144 *COL3A1* expression (Fig. 2g). In summary, the TFs had different outcome on CT differentiation.  
145 OSR1 and OSR2 drove undifferentiated limb mesenchymal cells towards irregular CT differentiation  
146 at the expense of cartilage differentiation. EGR1 induced tendon and cartilage marker expression,  
147 while not affecting irregular CT marker expression. KLF2, but not KLF4, promoted the expression  
148 of tendon markers, while both KLF factors increased *COL6A1* expression and decreased *COL2A1*  
149 expression. In conclusion, all five TFs proved functional in this model towards an effect on CT cell  
150 differentiation thus validating them for further analysis.

151

## 152 **Transcriptome analysis reveals similar regulatory functions between the five TFs**

153 To gain insight into regulatory functions of the five TFs, transcriptome analysis was performed by  
154 RNA-seq. Total RNAs were extracted from two independent biological replicates of 5-day chMM  
155 cultures overexpressing each of the TF and subjected to high-throughput sequencing. Principal  
156 components analysis (PCA) and hierarchical clustering of the Euclidean distances on global gene  
157 expression profiles depicted a separation between the TF-overexpressing chMM cultures (Fig. 3a;  
158 Additional file 1: Fig. S1). Consistent with their similar expression domains in irregular CT, the gene

159 expression profiles induced upon OSR1 and OSR2 overexpression were grouped together. In contrast,  
160 the gene expression profiles retrieved upon overexpression of the tendon-related TFs, EGR1, KLF2  
161 and KLF4, were gathered together in a second group. However, the gene expression profiles upon  
162 KLF2 and KLF4 overexpression were more similar to each other than that induced upon EGR1  
163 overexpression, which was consistent with their distinct expression domains associated with tendons.  
164 In summary, the gene expression profiles retrieved in the chMM cultures are in line with the limb  
165 expression patterns of the five TFs in the different CT subtypes.

166 Following differential expression analysis, we identified between 1,369 and 2,907 differentially  
167 expressed (DE) genes for each TF-overexpressing culture compared to control cultures, resulting in  
168 a total of 10,712 DE genes for all TFs (Additional file 1: Fig. S2a-e). Interestingly, DE genes detected  
169 across all chMM culture conditions corresponded to a list of 4,298 non-redundant genes, indicating  
170 that the TFs shared common regulatory targets (Fig. 3b; Additional file 2: Table S1). While about  
171 one third (1,487; 34.6%) of DE genes were specific to a single TF, 2,811 (65.4%) DE genes were  
172 shared by at least two TFs (Fig. 3b). In addition, 726 (16.9%) DE genes were identified in all TF-  
173 overexpressing culture conditions (Fig. 3b). This indicates that the five TFs share a core of common  
174 regulatory targets, despite being expressed in distinct CT subtypes. In line with this, fold-change  
175 comparison (whether the gene is upregulated or downregulated) of the DE genes shared by at least  
176 two TFs revealed a high consistency among the TF regulatory patterns. Only 48 (1.7%) shared DE  
177 genes were identified as being regulated in opposite directions between the subset of TFs  
178 misregulating them (Additional file 1: Fig. S3). Therefore, the TFs did not have only similarities in  
179 the genes they regulated, but also in the manner these genes were affected.

180 Given the high consistency in the TF regulatory patterns and the elevated number of shared regulated  
181 genes, a gene clustering approach was performed on the 4,298 non-redundant DE genes by using *K*-  
182 means. This approach partitioned the DE genes into 8 clusters (Fig. 3c). A gene ontology (GO)  
183 analysis was then performed to identify potential biological processes enriched within each cluster  
184 (Fig. 3d). Genes downregulated by all five TFs were mainly involved in protein localization, ion

185 transport and metabolic processes (Fig. 3c, d: cluster I). Genes upregulated by all five TFs were  
186 related to metabolic processes, gene expression, cellular component organization and several GO  
187 terms associated with the regulation of cell signalling and communication (Fig. 3c, d: cluster VIII).  
188 The clusters II, III, IV and V corresponded to genes upregulated specifically by one TF or by two  
189 closely related paralogous TFs (OSR1/OSR2 or KLF2/KLF4) (Fig. 3c). Genes in these clusters were  
190 mainly enriched for cell differentiation, mesoderm development, cell signalling/communication and  
191 biological/cell adhesion (Fig. 3d). Genes downregulated upon OSR1 and OSR2 overexpression were  
192 enriched for biological processes related to chondrogenesis (Fig. 3c, d: cluster VI), which was  
193 consistent with their anti-chondrogenic effect in chick cell cultures (Fig. 2c, d, g) [21]. Genes  
194 downregulated upon KLF2 and KLF4 overexpression were related to cell signalling and adhesion  
195 (Fig. 3c, d: cluster VII). In summary, the five CT-associated TFs differentially regulate the expression  
196 of genes mainly related to cell differentiation, signalling and adhesion. Thereby, they show a  
197 significant degree of overlapping regulatory function despite belonging to distinct CT subtypes.

198

### 199 **Molecular signatures downstream of the five TFs**

200 The gene clustering approach revealed that a high proportion of genes upregulated by the selected  
201 CT-associated TFs was involved in signal transduction and biological adhesion. To further investigate  
202 this feature, signalling pathway enrichment analysis was performed on the complete set of DE genes  
203 identified for each TF. Of particular interest, signalling pathways related to extracellular matrix  
204 (ECM) components, such as integrin and cadherin signalling pathways, Wnt signalling, CCKR  
205 signalling and angiogenesis were enriched across all five TFs (Fig. 4a). Additional pathways were  
206 specifically enriched by a subset of TFs. For instance, TGF- $\beta$  signalling pathway was identified upon  
207 overexpression of OSR1, OSR2 and KLF2, while Notch signalling pathway was enriched for both  
208 KLF2 and KLF4 DE genes (Fig. 4a). In addition, “axon guidance mediated by netrin” and  
209 “cytoskeletal regulation by Rho GTPase” pathways were enriched in both OSR1- and OSR2-  
210 associated DE genes (Fig. 4a). When comparing the averaged fold change across all TFs for each DE

211 gene, it appeared that DE genes within each aforementioned pathway were significantly upregulated  
212 (Fig. 4b: median log<sub>2</sub> fold change close to 1; Wilcoxon rank-sum test,  $P < 0.05$ ). This tendency was  
213 not observed for the remaining non-DE genes associated with these signalling pathways (Fig. 4c:  
214 median log<sub>2</sub> fold change close to 0). Nevertheless, a proportion of DE genes appeared rather  
215 downregulated for the integrin and TGF- $\beta$  signalling pathways (Fig. 4b: lower whisker). This  
216 corresponded to a set of genes mainly repressed by both OSR factors (Additional file 1: Fig. S4a, b).  
217 Most of these genes encode collagens and BMP/GDF signalling molecules associated with cartilage  
218 and bone development, consistent with the anti-chondrogenic function of OSR1 and OSR2 (Fig 2c,  
219 d, g) [21]. In agreement with the signalling pathway enrichment analysis, overrepresentation test on  
220 the 4,298 non-redundant DE genes highlighted ECM, membrane and cytoskeleton cellular  
221 components (Fig. 4d). Altogether, gene expression profiling of chMM cultures overexpressing each  
222 TF supports a core of common regulatory functions across all TFs related to cell signalling,  
223 communication and adhesion. In addition, each TF (or paralogous TFs) also appear to be involved in  
224 e.g. regulation of individual signalling pathways, which could contribute to create a local  
225 microenvironment related to each CT subtype.

226

## 227 **Establishing genome-wide TF binding profiles**

228 To further clarify the molecular mechanisms downstream of each TF, we investigated their genome-  
229 wide binding profile via ChIP-seq. Due to the absence of specific antibodies targeting each of the  
230 selected chicken TFs, we used the triple-FLAG (3F) tag that was fused C-terminally to the coding  
231 sequence (CDS) of each TF prior to their insertion into the RCAS-BP(A) vector. ChIP-seq was  
232 performed in two independent biological replicates of 5-day chMM cultures overexpressing each of  
233 the 3F-tagged TFs. Prior to ChIP, retroviral infection and overexpression of the recombinant TFs  
234 were assessed by immunohistochemistry and Western blot analysis against the 3F tag (Additional file  
235 1: Fig. S5a, b). Similarity across all ChIP-seq signal profiles was assessed genome-widely in 500-bp  
236 non-overlapping windows by PCA. Comparison of the three first principal components partitioned

237 the TF signal profiles by biological replicates and TF subgroups (Fig. 5a), indicating that paralogous  
238 TFs (OSR1/OSR2 and KLF2/KLF4) had a similar distribution across the genome.

239 Following peak calling, a total of 95,884 TF binding sites (TFBS) were identified (OSR1, 20,983;  
240 OSR2, 22,403; EGR1, 16,627; KLF2, 21,352; and KLF4, 14,519), which was 10-fold higher than the  
241 total number of DE genes. To potentially distinguish between functional and non-functional TF  
242 binding events, we decided to build a comprehensive map of the chMM chromatin landscape by  
243 characterizing promoter and enhancer regulatory domains. ChIP-seq experiments were performed  
244 against five histone post-translational modifications in two independent biological replicates of 5-day  
245 chMM cultures infected with retroviral particles overexpressing no recombinant protein,  
246 corresponding to the control conditions used for RNA-seq (Additional file 1: Fig. S6a). This approach  
247 was chosen to reveal the unbiased chromatin landscape in chMM cultures independently of TF  
248 overexpression. Mono-, bi- and tri-methylation of H3K4 (H3K4me1/2/3) were assessed to identify  
249 promoter and enhancer domains [23]. In addition, H3K27ac and H3K27me3 enrichments were  
250 investigated to distinguish between regions of transcriptional activity and facultative  
251 heterochromatin, respectively [23]. Based on this approach, we identified 20,427 promoters and  
252 55,597 enhancers (Additional file 1: Fig. S6b, c). Surprisingly, we observed a decreased enrichment  
253 for histone marks associated with transcriptional activity (H3K4me3, H3K27ac) compensated by an  
254 increased signal of the repressive mark H3K27me3 at the transcriptional start site (TSS) positions of  
255 DE genes, as compared to their genome-wide levels (Fig. 5b, c: y-axis scale). This tendency was  
256 confirmed when investigating the TSS positions of a set of randomly selected genes of similar size  
257 (Fig. 5d: y-axis scale). This suggested the existence of bivalent promoter domains, which are known  
258 to be enriched in lineage-regulatory genes [24]. Consistently, DE genes were more associated with  
259 bivalent promoter domains at their TSS positions than randomly selected genes, regardless of their  
260 similar gene expression levels (Fig. 5e, f: left panels, white curve). By separating H3K4me3 (active  
261 and bivalent promoters) and H3K27me3 (bivalent promoters only) signals, it appeared that H3K4me3  
262 active mark was overall less enriched at the TSS positions of DE genes than randomly selected genes



263 (Fig. 5e, f: middle panels), whereas the H3K27me3 repressive mark displayed an opposite distribution  
264 (Fig. 5e, f: right panels). Although we cannot exclude that the increased ratio between repressive and  
265 active signal at promoters of genes affected by TF overexpression may reflect regulatory dynamics  
266 in the different cell populations [25], bivalent promoter domains suggest that DE genes are overall  
267 dynamically regulated and likely associated with CT differentiation and subtype-specific function, as  
268 opposed to housekeeping and ubiquitous genes that would be active and expressed across all cell  
269 types in limb cultures.

270

### 271 **Genome-wide patterns of TF occupancy**

272 In order to assess TFBS functionality, binding locations identified for each TF were intersected with  
273 the regulatory domains. We focused on TFBS contained within promoters and enhancers, since we  
274 considered that binding events located in these regulatory domains likely contributed to the regulation  
275 of gene expression. Out of the 95,884 binding sites identified across all TFs, 31,289 (32.6%)  
276 overlapped promoter and enhancer regions, corresponding to 3,819-9,291 (17.9%-55.9%) binding  
277 events for each TF (Fig. 6a). De novo motif analysis was then performed on the 1,000 most significant  
278 binding sites for each TF. Recognition motifs identified for OSR1 and OSR2 were very similar and  
279 highly conserved with their known binding motifs in the fruit fly and the mouse (Fig. 6b) [26,27]. In  
280 agreement with previous reports, EGR1 and KLF4 binding motifs were enriched in cytosine/guanine  
281 (Fig. 6b) [26,28]. KLF2 recognition motif was highly consistent with the core binding sequence of  
282 the KLF protein family and was similar to the KLF4 secondary motif (Fig. 6b) [29]. Both binding  
283 motifs identified for KLF4 could contribute to its regulatory pattern observed in limb cell cultures,  
284 considering the 767 DE genes specifically identified for KLF4 and the 1,866 DE genes shared  
285 between KLF4 and KLF2 (Fig. 3b). Given the shared DE genes and the analogous recognition motifs,  
286 we then wondered whether the TFs depicted similarities regarding their occupancy within promoters  
287 and enhancers. Summit locations of all TFBS were retrieved and compared to each other. Binding  
288 events located within 500 bp surrounding peak summits ( $\pm 250$  bp) were considered as shared binding

289 locations. The 31,289 TFBS associated with promoters and enhancers corresponded to 17,714  
290 binding regions. Out of these 17,714 regions, 10,979 (62.0%) were specific to a single TF, whereas  
291 6,735 (38.0%) were shared by at least two TFs, including 1,045 (5.9%) that were common to the five  
292 TFs (Additional file 1: Fig. S7a). Shared occupancy among the TFs was further assessed by  
293 comparing the total number of shared binding sites that were identified between each TF pair.  
294 Consistent with their similar binding motifs, OSR1 and OSR2 shared more binding locations with  
295 each other than with any other TF (Additional file 1: Fig. S7b, c). Likewise, EGR1 and KLF4 tended  
296 to bind preferentially at similar regions as compared to the other TFs (Additional file 1: Fig. S7d, e).  
297 Surprisingly, we did not observe any preferential binding for KLF2 with any of the other TFs,  
298 including KLF4 (Additional file 1: Fig. S7f). Altogether, the binding motifs of the TFs and their  
299 genome-wide occupancy profiles appear consistent with the common and distinct regulatory patterns  
300 observed at the gene expression level.

301

### 302 **Identification of functional TFBS confirms a common regulatory core and distinct functions** 303 **for the five TFs**

304 To finally distinguish between indirectly and directly regulated genes, the 17,714 non-redundant  
305 binding regions identified across all TFs were intersected with the 4,298 DE genes identified from  
306 the RNA-seq data. Regions spanning from 10 kb upstream of the gene TSS to 10 kb downstream of  
307 the gene 3'-end were investigated for the presence of TFBS located within regulatory domains. This  
308 resulted in the identification of 3,210 genes that were potentially directly regulated by the TFs  
309 (Additional file 2: Table S1). The proportion of putative direct targets ranged from 20.9% (OSR1,  
310 417; KLF2, 449) to 49.4% (EGR1, 677), depending on the TF (Fig. 6c). Consistent with the previous  
311 observations that the TFs shared common regulatory patterns and binding events in addition to their  
312 own specificity, the 3,210 genes considered as potential direct targets corresponded to 1,858 non-  
313 redundant genes (Fig. 6d). While 1,076 (57.9%) genes were directly regulated by a single TF, 782  
314 (42.1%) genes were shared by at least two TFs, including 77 (4.1%) genes common to all TFs (Fig.

315 6d). In particular, OSR1 and OSR2 shared 318 target genes, while KLF4 possessed 317 target genes  
316 in common with EGR1 and 313 target genes in common with KLF2 (Fig. 6d). To further explore the  
317 regulatory link existing between the TFs, we next investigated whether the TFs sharing the same  
318 target genes tended to display similar binding locations. Consistent with the genome-wide occupancy  
319 analysis, OSR1 and OSR2 shared more binding locations with each other than with any other TF,  
320 albeit OSR2 displayed a higher binding specificity than OSR1 (Additional file 1: Fig. S8a, b).  
321 Likewise, EGR1 and KLF4 tended to bind preferentially at similar regions as compared to the other  
322 TFs, while also exhibiting their own binding specificity (Additional file 1: Fig. S8c, d). In contrast to  
323 the genome-wide occupancy analysis that did not depict any preferential binding between KLF2 and  
324 KLF4, we observed that both TFs tended to occupy similar locations in the vicinity of their common  
325 target genes, as compared to the other TFs (Additional file 1: Fig. S8e, f). In conclusion, the binding  
326 profiles of CT-associated TFs reflect their specificity and similarity in regards to their regulatory  
327 patterns.

328

### 329 **Validation of selected target genes**

330 Coexpression of a TF and its putative target gene is a prerequisite for transcriptional regulation.  
331 Therefore, we compared the expression domains of TFs with that of selected candidate genes  
332 encoding signalling molecules in chick limbs. *NTNI* (netrin 1) was one of the genes that was  
333 upregulated in limb cell cultures upon overexpression of each TF (Fig. 7a; Additional file 1: Fig. S9a;  
334 Additional file 2: Table S1), through binding within an intronic enhancer (Fig. 7b). *NTNI* encodes a  
335 laminin-related secreted protein involved in axon guidance [30,31]. In E5.5 chick embryos, *NTNI*  
336 was expressed in both limb stylopod and zeugopod, displaying overlapping expression domains with  
337 those of all five TFs (Fig. 7c-h). At E8, *NTNI* was expressed in tendons, overlapping with *EGR1*  
338 expression domain close to muscle attachment (Fig. 7i, j). *NTNI*, *OSR1* and *OSR2* expression was  
339 observed in muscle CT at E9.5 (Fig. 7k-m). In addition, *NTNI* transcripts were detected in tissues  
340 delineating tendons at E9.5, similarly to *KLF2* and *KLF4* transcripts (Fig. 7n-p).

341 Given the similar regulatory profiles of OSR1 and OSR2, we also selected *WNT11*, a common target  
342 gene of both TFs. *WNT11* encodes a secreted component of the non-canonical Wnt planar cell polarity  
343 pathway [32]. Both OSR factors increased *WNT11* expression in chMM cultures and bound at the  
344 same location within an intronic enhancer (Fig. 8a, b; Additional file 1: Fig. S9b; Additional file 2:  
345 Table S1). In E5.5 chick embryos, *WNT11* was expressed in limb mesenchyme, consistent with *OSR1*  
346 and *OSR2* expression patterns (Additional file 1: Fig. S9c-e). At E8 and E9.5, *WNT11* transcripts  
347 were detected in irregular CT within and surrounding muscles, overlapping with *OSR1* and *OSR2*  
348 transcripts (Fig. 8d-i). *WNT11* expression in CT downstream of OSR1 and OSR2 is consistent with  
349 the identified role of WNT11 in regulating muscle fibre type and orientation [33]. An additional target  
350 gene, *GDF6*, which encodes a secreted signalling factor of the TGF- $\beta$  superfamily [34], was  
351 upregulated upon overexpression of OSR1 and OSR2 in chMM cultures (Fig. 8a; Additional file 1:  
352 Fig. S9b; Additional file 2: Table S1). However, only a binding site for OSR2 was detected in the  
353 vicinity of *GDF6*, indicating that OSR1 was not directly involved in the regulation of *GDF6*  
354 expression (Fig. 8c). In limbs of E5.5 and E8 chick embryos, *GDF6* expression domains overlapped  
355 with those of *OSR2* (Fig. 8j, k; Additional file 1: Fig. S9d, f).

356 As a specific target gene of EGR1, we selected *WNT4*, which encodes a secreted member of the  
357 canonical Wnt signalling pathway [35]. *WNT4* was upregulated upon EGR1 overexpression in chMM  
358 cultures and was associated with an EGR1 binding site in its promoter region (Fig. 8l, m; Additional  
359 file 1: Fig. S9g; Additional file 2: Table S1). This is consistent with previous findings where EGR1  
360 has been shown to bind upstream of *Wnt4* gene in the uterine endometrium during mouse pregnancy  
361 [36]. *EGR1* and *WNT4* displayed overlapping expression domains in proximal regions of forelimbs  
362 of E5.5 chick embryos (Additional file 1: Fig. S9h, i) and in tendons, close to muscle attachment in  
363 E8 limbs (Fig. 8n-p).

364 Given the common regulatory patterns of both KLF factors, we selected *FZD1*, which encodes a  
365 frizzled class receptor of Wnt signalling proteins [37]. *FZD1* was upregulated upon overexpression  
366 of KLF2 and KLF4 in chMM cultures (Fig. 8q; Additional file 1: Fig. S9j; Additional file 2: Table

367 S1), and harboured a binding site for both KLF factors within its promoter region (Fig. 8r). In E8  
368 chick embryos, *FZD1* was expressed in tissues delineating tendons, overlapping with the expression  
369 domains of *KLF2* and *KLF4* (Fig. 8t-v). Considering that KLF4 also displayed a distinct regulatory  
370 profile (Fig. 3c, 6d), we selected *INHBA*, which encodes the inhibin beta A subunit, a member of the  
371 TGF- $\beta$  signalling pathway [38]. *INHBA* was upregulated upon KLF4 overexpression in chMM  
372 cultures (Fig. 8q; Additional file 1: Fig. S9j; Additional file 2: Table S1). In addition, a KLF4 binding  
373 site was located within an enhancer upstream of the TSS position of *INHBA* (Fig. 8s). In E5.5 and E8  
374 chick limbs, *INHBA* and *KLF4* displayed overlapping expression domains in tissues delineating  
375 tendons (Fig. 8u, w; Additional file 1: Fig. S9k-m). Altogether, the selected target genes and their  
376 related CT-associated TFs exhibited overlapping expression domains in chick limbs.

377

#### 378 **Common and divergent signalling/ECM signatures regulated by the CT-associated TFs**

379 CT cells shape their microenvironment mainly by production of signalling/ECM molecules and/or  
380 via remodelling of the ECM. To explore this feature, we built a regulatory network on the 189 DE  
381 genes that were associated with seven of the previously identified signalling pathways (Fig. 4a, b;  
382 Additional file 2: Table S1). The resulting transcriptional network was composed of 513 interactions  
383 divided between 175 (34.1%) direct and 338 (65.9%) indirect connections (Fig. 9a). This network  
384 highlighted common and unique features for the CT-associated TFs. 38 (20.1%) genes were regulated  
385 by all five TFs, revealing a CT-typical signalling signature, whereas 47 (24.9%) genes were  
386 exclusively shared by paralogous TFs (*OSR1/OSR2* and *KLF2/KLF4*) and 45 (23.8%) genes were  
387 specific to a single TF (Fig. 9a; Additional file 2: Table S1). The regulatory network was then  
388 subdivided for each individual TF to visualize the molecular interplay of each TF on selected  
389 signalling pathways (Additional file 1: Fig. S10-14). For instance, the Wnt signalling pathway was  
390 differently affected depending on the TF, with different sets of *WNT* ligand and *FZD* receptor genes  
391 regulated by each TF (Additional file 1: Fig. S10-14).

392 To reduce complexity, we then focused on the Notch, TGF- $\beta$  and Wnt signalling pathways (Fig. 9b).  
393 Key components of these signalling pathways, *NOTCH1* (Notch receptor) and *SMAD4* (TGF- $\beta$   
394 signalling transducing protein) were regulated by all five TFs (Fig. 9b; Additional file 2: Table S1).  
395 By contrast, other genes were regulated by a subset of TFs. For instance, *WNT11* and *BMPRI1B* (BMP  
396 receptor) were specific to OSR1 and OSR2, whereas *FZD1* and *PRKCQ* (protein kinase C theta) were  
397 regulated exclusively by both KLF factors (Fig. 9b; Additional file 2: Table S1). Lastly, we found  
398 genes that were specific to a single TF. This is the case for *GDF6* and *SMAD9* directly upregulated  
399 by OSR2, *WNT4* and *TCF7L1* (*TCF3*) directly upregulated by EGR1, and *INHBA* and *BMP8B* (BMP  
400 secreted ligand) directly upregulated by KLF4 (Fig. 9b; Additional file 2: Table S1). Altogether, this  
401 regulatory network identifies signalling genes that likely contribute to the biological function of all  
402 CTs or CT subtypes.

403 By finally focusing on direct target genes associated with the ECM, we found that the TFs regulated  
404 distinct, nevertheless partly overlapping molecular niches (Fig. 9c; Additional file 2: Table S1).  
405 *ADAMTS15* was directly upregulated by the five TFs and *ADAMTS8* was specific to EGR1, whereas  
406 *ADAMTS18* was directly downregulated by OSR2 and KLF2, (Fig. 9c; Additional file 2: Table S1).  
407 ADAMTS proteins are secreted metalloproteases with thrombospondin type-I motif that are involved  
408 in procollagen processing [39]. While ADAMTS15 and ADAMTS8 have proteoglycanolytic activity  
409 [39], mutations in *ADAMTS18* have been associated with bone disorders [40]. In addition, CT-  
410 associated TFs appeared to mediate collagen deposition by directly regulating genes encoding  
411 collagen  $\alpha$ -chains. *COL4A1* and *COL4A2* were directly upregulated by OSR1, OSR2 and KLF2 (Fig.  
412 9c; Additional file 2: Table S1). Type-IV collagen contributes to the assembly of basal lamina by  
413 binding to laminins [41]. By contrast, *COL9A1*, *COL9A2* and *COL11A1* were directly downregulated  
414 by OSR1 and OSR2 (Fig. 9c; Additional file 2: Table S1). Type-IX and XI collagens are known to  
415 form a network with type-II collagen in cartilaginous ECM [42]. KLF4 directly promoted the  
416 expression of *COL1A1* (Fig. 9c; Additional file 2: Table S1). Type-I collagen fibrils are the main  
417 component of tendons [7]. The ECM also acts as a source of developmental signals by sequestering

418 and diffusing paracrine factors. The TFs appeared to directly mediate the positive expression of genes  
419 encoding laminin-related secreted netrins, such as *NTN1* (all five TFs), *NTN3* (EGR1 and KLF4)  
420 *NTN4* (OSR1 and EGR1) and *NTNG1* (OSR2) (Fig. 9c; Additional file 2: Table S1). In conclusion,  
421 the CT-associated TFs contribute to provide local patterning cues by mediating the expression of  
422 precise environmental molecules.



## 423 **Discussion**

424 In this study, we have designed a transcriptional network downstream of five zinc finger TFs involved  
425 in CT differentiation. Two TFs (OSR1 and OSR2) were related to irregular CT, one TF (EGR1) to  
426 regular CT (tendon), and two TFs (KLF2 and KLF4) showed expression in CT delineating tendons.  
427 By combining different genome-wide strategies, we identified common and specific molecular  
428 signatures involved in limb CT differentiation. TF overexpression led to transcriptional activity  
429 changes in limb cells impacting on numerous cellular processes, including cell communication,  
430 migration and cell-cell/cell-matrix adhesion processes. Consistently, genes encoding signalling  
431 molecules, ECM components and cytoskeletal proteins appeared as regulated by the five TFs.

432

### 433 **Core molecular network downstream of the five TFs**

434 We found 4,298 non-redundant DE genes upon overexpression of the five TFs. 65.4% of these genes  
435 were shared by at least two TFs, while 16.9% were common to all TFs. When direct regulation as  
436 judged by TF binding was considered, 77 genes were shared between the five TFs (Additional file 2:  
437 Table S1). We performed a conservative analysis and also restricted regulatory elements to a distance  
438 of 20 kb. It is well established that enhancer elements can be located further away, however  
439 identification of these regulatory interactions would include analysis of the 3D chromatin structure  
440 [43]. Altogether the number of common targets we identified is likely to be imperfect. Our data  
441 nevertheless show that the five TFs display common target genes despite their expression in different  
442 subcompartments of limb musculoskeletal system. This indicates that irrespective of CT type,  
443 whether it is specialized, dense regular or dense irregular, key molecular features are shared during  
444 the differentiation process of CT types, suggesting an archetypical CT signature.

445 One example for a common and directly regulated gene downstream of the five TFs is *NTN1*. Netrin  
446 1 is a secreted ligand involved in axon guidance and developmental angiogenesis, in addition to  
447 preventing apoptosis triggered by one of its receptors, DCC (deleted in colorectal cancer) [44]. With



448 the exception of EGR1, which only activates the expression of netrin ligands (*NTN1*, *NTN2* and  
449 *NTN3*), the other TFs positively regulate the expression of netrin receptors, *UNC5A* and/or *UNC5B*  
450 (Additional file 2: Table S1), known to mediate the netrin 1-induced axon chemorepulsion [44]. Our  
451 data suggests that *NTN1* is an unexpected actor involved in migration and/or survival of CT cells  
452 during limb development. The molecular core downstream of the five TFs also includes a  
453 myofibroblast signature with *SRF*, *TAGLN* (*SM22*, transgelin), *TAGLN2* (transgelin 2), *CNN1*  
454 (calponin 1) and *ACTG2* (actin gamma 2) genes, which are positively activated by the five TFs,  
455 although not involving systematically direct binding sites (Additional file 2: Table S1). The  
456 myofibroblast signature is also confirmed by the presence of *SMAD4* in the list of the 77 common  
457 and directly regulated genes (Additional file 2: Table S1). *SMAD4* is a well-known profibrotic factor  
458 downstream of TGF- $\beta$ 1 [45]. The myofibroblast signature upon TF overexpression indicates that  
459 developmental CT differentiation shares molecular mechanisms with myofibroblast activation during  
460 fibrosis. In this context, it is noteworthy that *NOTCH1*, a component of a developmental signalling  
461 pathway described to be also involved in adult fibrosis [46], is a common and directly regulated gene  
462 downstream of the five TFs (Additional file 2: Table S1). The upregulation of Notch pathway  
463 components by each of the TFs suggests an unexpected involvement of the Notch signalling in limb  
464 CT formation during development.

465

#### 466 **Specific regulatory patterns downstream of the five TFs**

467 In addition to sharing a common molecular core, each TF displayed a specific regulatory pattern,  
468 albeit convergence was observed between related TFs, i.e. between *OSR1* and *OSR2* associated with  
469 irregular CT, and between *EGR1*, *KLF2* and *KLF4* mainly associated with regular CT. *OSR1* and  
470 *OSR2* are two markers of irregular CT and overexpression of each factor promotes the expression of  
471 irregular CT markers, such as *COL3A1*, while inhibiting that of cartilage markers in chick limb cells,  
472 as previously observed [21]. The list of *OSR1* and *OSR2* target genes identifies a molecular signature  
473 of irregular CT downstream of *OSR* factors in chick limb cells and potentially increases the limited

474 number of irregular CT markers that are currently available. In addition, OSR1 and OSR2 represses  
475 the expression of genes related to cartilage lineage, which is consistent with the upregulation of  
476 cartilage-associated genes observed in *Osr1*-positive cells extracted from limbs of *Osr1* null mouse  
477 embryos [Vallecillo Garcia et al. in revision]. The master regulator of cartilage *SOX9* appears to be a  
478 direct target of OSR2, and the accessory regulatory factors *SOX5* and *SOX6* appear to be direct targets  
479 of both OSR1 and OSR2 in chMM cultures (Additional file 2: Table S1). OSR1 and OSR2 share 318  
480 common target genes, but also display their own specificity. While only 42 target genes are unique  
481 to OSR1, 250 target genes are specifically regulated by OSR2 (Additional file 2: Table S1). The BMP  
482 ligand *GDF6* is one of the OSR2 specific target genes. *GDF6* is known to play a role in establishing  
483 boundaries between skeletal elements during limb development, since inactivation of the *Gdf6* gene  
484 causes defects in joint, ligament and cartilage formation in mice [34]. This is in line with *Osr2/OSR2*  
485 expression in joint interzones in mouse [20] and chick embryos (Fig. 8j), as well as with the joint  
486 fusion defects observed in *Osr1/Osr2* double mouse mutants [47].

487 Although not being specific to tendons, EGR1 overexpression is sufficient to drive tendon cell  
488 differentiation in mouse mesenchymal stem cells [17]. Over 100 genes upregulated upon EGR1  
489 overexpression were listed as being enriched in the transcriptome of *Scx*-positive cells isolated from  
490 limbs of mouse embryos [48]. This list includes *ADAMTS8*, *ADAMTS15*, *TAGLN*, *TAGLN2*, *FZD5*  
491 and *WNT4*, among others (Additional file 2: Table S1). *BMP4*, known to be expressed in chick limb  
492 tendons [49], was also positively regulated by EGR1 (although not directly) in our data (Additional  
493 file 2: Table S1). EGR1 is characterised as a fibrosis-promoting factor in many organs [50]. EGR1  
494 has been also shown to directly regulate *Tgfb2* transcription in adult mouse tendons [17]. Here, we  
495 show that *TGFB1* (coding for the main fibrotic factor) is positively regulated by EGR1 (albeit not  
496 directly) in chick limb cells (Additional file 2: Table S1).

497 The exact function of KLF2 and KLF4 in limb musculoskeletal system formation is currently not  
498 known. However, we show here that both TFs display a striking expression delineating *SCX*-positive  
499 tendon/ligaments. In addition to the clear adhesion/migration signature downstream of both KLF

500 factors in chick limb cells, KLF2 and KLF4 activates cell cycle genes such as *CDKN1A (P21)* and  
501 pluripotency genes (*SOX7, DKK1*, among others). Combined with the KLF2 and KLF4 well-known  
502 function in somatic cell reprogramming and pluripotency [51], this leads to the interesting idea that  
503 cells surrounding *SCX*-positive expression domains could be a source of tendon progenitors during  
504 development. Consistent with this idea, different tenogenic properties have been described for  
505 peritenon cells and tendon proper cells [52]. Beyond the 313 target genes that are shared between  
506 both KLFs and their similar binding occupancy in the vicinity of these target genes, KLF4 possesses  
507 439 specific target genes. KLF4 specificity is corroborated with its primary binding motif that differs  
508 from the KLF core binding sequence identified in KLF2 and KLF4 ChIP-seq data. Indeed, the KLF4  
509 binding site identified upstream of *INHBA* encompasses its primary recognition motif, whereas KLF2  
510 and secondary KLF4 binding motifs are detected in the promoter region of their common target gene  
511 *FZD1*.

512

### 513 **A versatile molecular toolkit for shaping local niches**

514 A significant proportion of directly or indirectly regulated DE genes comprises genes encoding  
515 signalling-associated molecules or ECM components and cell-matrix attachment molecules. The  
516 ECM is a three-dimensional insoluble network composed of secreted macromolecules, which  
517 provides positional and physical cues to influence cell position and migration [53,54]. Moreover, the  
518 ECM is a storage space for diverse growth factors that can be released upon e.g. proteolytic cleavage  
519 or mechanical stimulation. In this view, the ECM is both a scaffold structure and an integral part of  
520 cell-cell signalling mechanisms. Our data provide evidence that regional subspecification of limb bud  
521 mesenchymal tissues by TFs may be concomitant to local changes in the extracellular milieu.  
522 Importantly, we show that a common ECM signature activated by all five TFs exists for limb CT,  
523 while in addition each TF drives specific ECM and signalling factor genes. Individual TF or  
524 combinatorial TFs will impinge on the production of a particular ECM with specific growth factor  
525 decoration. This likely influences the behaviour of neighbouring tissues to create niches for invading

526 cells. This is in line with the recognized importance of cell-ECM interactions for skeletal muscle,  
527 nerve and blood vessel development [55,56]. Thus, each TF or coordinated expression of a  
528 combination of TFs may be an elegant and adaptable way to achieve tissue  
529 (sub)compartmentalization in development.

## 530 **Conclusions**

531 The transcriptional network presented here brings new insights into the molecular mechanisms  
532 orchestrating chick limb CT differentiation and function. The activity of CT-associated TFs impinges  
533 on overall common mechanisms including cell adhesion, migration and signalling. However, in  
534 addition to a common gene regulatory core downstream of the five TFs, each TF drives a specific  
535 program. These common and specific programs are likely to be at the root of tissue subspecification  
536 and local compartmentalization in developing limbs leading to the creation of local niches supporting  
537 organogenesis. This regulatory network offers valuable resources and opens new roads to better  
538 understand CT formation and function during limb development. In addition, such adaptable local  
539 transcriptional programs may apply to diverse contexts and might be a general principle of functional  
540 modulation.

## 541 **Methods**

### 542 **Experimental procedures**

#### 543 **Chick embryos**

544 Fertilized eggs used for in situ hybridization were provided by the Institut de Sélection Animale (JA  
545 57 strain, Lyon, France). Fertilized eggs used to prepare chMM cultures were obtained from VALO  
546 BioMedia (Lohmann Selected Leghorn strain, Osterholz-Scharmbeck, Germany). Embryos were  
547 staged according to the number of days in ovo at 37.5°C.

#### 548 **Molecular cloning of the transcription factors**

549 The CDSs of the chicken TFs OSR1, OSR2, EGR1, KLF2 and KLF4 were amplified by PCR by  
550 using the primers listed in (Additional file 3: Table S2). Cloning of the TF CDSs was performed by  
551 using a modified version of the pSlax-13 vector and the RCAS-BP(A) vector as previously described  
552 [57], with the exception that the 3F tag was fused C-terminally to each CDS.

#### 553 **Chick micromass cultures**

554 chMM cultures were prepared as previously described [58]. Briefly, limb buds were extracted from  
555 E4.5 chick embryos, ectoderm was dissociated by using a Dispase solution (Gibco) at 3 mg/mL, and  
556 limb mesenchyme was digested by using a solution composed of 0.1% Collagenase type Ia (Sigma-  
557 Aldrich), 0.1% Trypsin (Gibco) and 5% FBS (Biochrom) in 1X DPBS (Gibco). Prior to seeding,  
558 mesenchymal cells were mixed with retroviruses (1:1) and maintained in culture for 5 days at 37°C  
559 in DMEM/Ham's F-12 (1:1) medium (Biochrom) supplemented with 10% FBS, 0.2% chicken serum  
560 (Sigma-Aldrich), 1% L-glutamine (Lonza) and 1% penicillin/streptomycin (Lonza). To assess  
561 cartilage differentiation, chMM cultures were fixed for 30 min with Kahle's fixation solution (1%  
562 formalin, 30% ethanol and 4% acetic acid) and stained overnight at 4°C in 1% Alcian blue (Sigma-  
563 Aldrich) in 0.1 M HCl. Chondrogenic matrix areas were measured by using ImageJ [59]. For Eosin  
564 staining, chMM cultures were fixed overnight with 4% PFA in 1X PBS at 4°C and incubated for 2  
565 min with 2.5 g/L of Eosin (Sigma-Aldrich) in 80% ethanol and 0.5% acetic acid. Viral 3F-tagged TF

566 expression was monitored by using a mouse antibody directed against the 3F tag (Sigma-Aldrich,  
567 F1804; 1:500). Immunohistological staining was performed by using the Vectastain Elite ABC and  
568 the DAB Peroxidase Substrate kits (Vector Laboratories).

### 569 **RNA sequencing**

570 Two biological replicates of chMM cultures were prepared from two independent pools of E4.5 limb  
571 buds and infected for 5 days with RCAS-BP(A) retroviruses overexpressing each of the TFs or no  
572 recombinant protein as control. For both replicates, RNA extracts were obtained by harvesting 6  
573 chMM cultures with RLT buffer (Qiagen). Total RNAs were purified by using the RNeasy mini kit  
574 (Qiagen) in combination to a DNase I (Qiagen) treatment to prevent genomic DNA contamination.  
575 RNA libraries were prepared by using the TruSeq Stranded mRNA Library Preparation kit (Illumina),  
576 which enables to preserve the RNA strand orientation. Strand-specific 50-bp paired-end reads were  
577 generated by using a HiSeq 2500 sequencer (Illumina) with a mean insert size of 150 bp (Additional  
578 file 3: Table S3).

### 579 **ChIP sequencing**

580 Harvesting of chMM cultures and ChIP experiments were performed as previously described [57].  
581 Histone modification occupancy was investigated in two independent biological replicates of chMM  
582 cultures infected with RCAS-BP(A) retroviruses overexpressing no recombinant protein. 10 µg (8  
583 chMM cultures) of chromatin extracts were incubated overnight at 4°C with gentle rocking with the  
584 following antibodies: 4 µg of mouse anti-H3K4me1 (Abcam, ab8895); 8 µL of mouse anti-H3K4me2  
585 (Abcam, ab32356); 4 µL of mouse anti-H3K4me3 (Millipore, 07-473); 4 µg of mouse anti-H3K27ac  
586 (Abcam, ab4729); and 4 µg of mouse anti-H3K27me3 (Millipore, 07-449). TF binding profiles were  
587 investigated in two independent biological replicates of chMM cultures infected with RCAS-BP(A)  
588 retroviruses overexpressing each of the TFs. 30 µg (24 chMM cultures) of chromatin extracts were  
589 incubated overnight at 4°C with gentle rocking with 10 µg of mouse anti-FLAG (Sigma-Aldrich,  
590 F1804). Antibody-TF/Histone-DNA complexes were pulled down by using 40 µL of magnetic beads  
591 (Dynabeads protein G; Thermo Fischer). Ethanol-precipitated ChIP samples were resuspended in 46

592  $\mu$ L of ddH<sub>2</sub>O. Libraries were prepared by using the NEBNext Ultra DNA Library Preparation kit for  
593 Illumina (New England Biolabs). 50-bp single-end reads were generated by using a HiSeq 1500  
594 sequencer (Illumina) (Additional file 3: Tables S4, 5). As input control, sonicated DNA from the  
595 nuclear fraction of each sample used for the ChIP procedures was also sequenced.

#### 596 **In situ hybridization**

597 Endogenous expression of the TFs was assessed by in situ hybridization on paraffin-embedded tissue  
598 sections. Chick embryo limbs were fixed overnight at 4°C in 60% ethanol, 30% formaldehyde at 37%  
599 and 10% acetic acid, and further processed as previously described [60]. For whole-mount in situ  
600 hybridization, chick embryos were fixed overnight at 4°C with 4% formaldehyde in 1X PBS and  
601 processed as previously described [61]. The following probes were used: *cOSR1* and *cOSR2* [20];  
602 *cEGR1* [16]; *cKLF2* and *cKLF4* [62]. Expression of tendon and myogenic markers were assessed  
603 with the following probes: *cSCX* [15]; *cMYOD* [63]. Primers listed in (Additional file 3: Table S2)  
604 were used to generate probes detecting the following genes: *cFZD1*; *cGDF6*; *cINHBA*; *cNTN1* [64];  
605 *cWNT4* (GEISHA ID, WNT4.UApcr); *cWNT11* (GEISHA ID, WNT11.UApcr).

#### 606 **Quantitative RT-PCR analysis**

607 Total RNAs were isolated from independent biological replicates of chMM cultures infected for 5  
608 days with RCAS-BP(A) retroviruses overexpressing each of the TFs or no recombinant protein as  
609 control. RNA extracts were obtained as described for RNA sequencing. 500 ng of RNA extracts were  
610 used as template for cDNA synthesis using the High-Capacity cDNA Reverse Transcription kit  
611 (Applied Biosystems). Quantitative RT-PCR was performed by using the SYBR Green PCR Master  
612 mix (Applied Biosystems) in duplicates. Relative mRNA levels were calculated according to the 2-  
613  $\Delta\Delta$ Ct method [65].  $\Delta$ Cts were obtained from Ct normalized with chick *RPS17* (*S17*) and *GAPDH*.  
614 For each investigated gene, the mRNA levels of control chMM cultures were normalized to 1.  
615 Statistical analysis was performed by using Mann-Whitney U test with the GraphPad Prism V6  
616 software. Primers used for quantitative RT-PCR are listed in (Additional file 3: Table S2).



617

## 618 **Computational analysis**

### 619 **Gene expression profiles**

620 RNA-seq strand-specific read pairs were mapped against the chicken genome galGal4 [66] by using  
621 TopHat2 v0.14 [67] (parameters: -r 150; -N 3; --read-edit-dist 3; --library-type fr-firststrand; -i 50; -  
622 G) and the gene annotation model previously generated [68]. Alignment maps were split by strand  
623 by using SAMtools v1.2 [69] according to their FLAG field (strand plus: -f 128 -F 16, -f 80; strand  
624 minus: -f 144, -f 64 -F 16). Fragments (both reads of a pair) mapped on gene features were counted  
625 by using featureCounts v1.4.6-p3 [70] (parameters: -p; -s 2; --ignoreDup; -B; -R). Chimeric fragments  
626 aligned on different chromosomes were taken into consideration to overcome the gene fragmentation  
627 due to the location of gene parts on multiple chromosome contigs [68]. Fragment counts were then  
628 normalized by using DESeq2 v1.8.1 [71] and transcript abundances were calculated as transcripts per  
629 million (TPM) values according to the formula described in [72]. To evaluate the discrepancy among  
630 biological replicates and conditions, a regularized-logarithm (rlog) transformation was applied to  
631 normalized fragment counts followed by PCA analysis and hierarchical clustering of the Euclidean  
632 distances [71]. Differential expression analysis was finally carried out by using DESeq2 and a false-  
633 discovery rate (FDR; alpha) of 0.01. Genes with an absolute fold change of at least 2 and a Benjamini-  
634 Hochberg adjusted p-value (padj) below 0.01 were considered as being differentially expressed  
635 (Additional file 2: Table S1). Heat maps were generated by using the function heatmap.2 from the R  
636 package gplots. For given gene lists, rlog transformed fragment counts were used as input and  
637 hierarchical clustering was performed according to the one minus Pearson correlation.

### 638 **K-means gene clustering**

639 K-means clustering was performed on the normalized fragment counts of the DE genes by using  
640 GENE-E [73] with a row distance metric set at 1 minus Pearson correlation and 2,000 iterations. The

641 number of  $K$  clusters was defined at 8 because lower values did not separate distinct gene clusters  
642 and higher values subdivided meaningful gene clusters.

### 643 **Gene ontology analysis**

644 GO analyses were performed for given gene lists by using the PANTHER statistical  
645 overrepresentation test r20160321 [74] and the Bonferroni correction for multiple testing. The  
646 following annotations were interrogated: PANTHER version 10.0 released on 2015-05-15 for GO-  
647 slim biological process, cellular component and pathways; GO ontology database released on 2016-  
648 04-23 for GO biological process complete.

### 649 **ChIP-seq coverage profiles**

650 50-bp single-end reads generated for each ChIP and input fractions were first filtered on their quality  
651 by using the FASTX-Toolkit v0.0.13 [75]. Reads with a median quality value of minimum 28 were  
652 retrieved and mapped against the chicken genome galGal4 [66] by using BWA v0.5.9 [76] (default  
653 parameters). Uniquely mapped reads were then extracted and duplicated reads were finally removed  
654 by using the tool rmdup from SAMtools v1.2 [69]. Histone mark and TF coverage profiles were  
655 generated by using the tool bdgcmp from MACS2 v2.1.0.20140616 [77]. ChIP-seq signal was  
656 normalized independently for each biological replicate against the pooled input controls of both  
657 replicates according to the negative log<sub>10</sub> of the Poisson p-value (-m ppois). Similarity between the  
658 TF binding profiles was assessed genome-widely in 500-bp non-overlapping windows by using PCA  
659 analysis with the R function prcomp (parameters: center TRUE; scale. TRUE).

### 660 **Histone modification peak calling**

661 Peak calling for the histone ChIP-seq was performed as suggested by the ENCODE consortium [78].  
662 For each histone modification, peaks were called independently for each biological replicate and for  
663 the pooled biological replicates, each time against the merged input control of both replicates, by  
664 using MACS2 v2.1.0.20140616 [77] (parameters: --bw 400, according to the sonicated DNA size; -  
665 g 1.0e9; --to-large). Except for the H3K27me3 mark, peak calling was performed twice for each

666 replicate and pooled replicate: (i) narrow peaks passing a p-value (-p) of 0.01; and (ii) broad peaks  
667 passing an additional broad-peak p-value (-p 0.01; --broad; --broad-cutoff) of 0.1. Only broad peaks  
668 were called for the H3K27me3 ChIP-seq due to its diffused signal. Broad peaks detected for each  
669 replicate and pooled replicate that contain at least one narrow peak were extracted by using BEDtools  
670 intersect v2.24.0 [79]. Final sets of peaks for each histone modification were obtained by filtering  
671 broad peaks called for the pooled replicates that are shared between both biological replicates  
672 independently.

### 673 **Identification of regulatory domains**

674 Regulatory domains were defined according to the combination of the different histone modification  
675 profiles obtained by ChIP-seq, independently of the gene annotation model and TSS positions given  
676 the fragmentation of the chicken genome [68]. Domains were divided into three categories: (1)  
677 promoters; (2) enhancers; and (3) repression islands. (1) Promoters were defined according to the  
678 presence of H3K4me3 signal. (2) Enhancers corresponded to regions enriched for H3K4me1 and  
679 devoid of H3K4me3 signal. (3) Repression islands were distinguished by the unique presence of  
680 H3K27me3 signal. Additional regions enriched for H3K4me2 but with no detectable H3K4me1  
681 signal were classified as promoters, whereas regions containing both H3K4me1/2 marks were defined  
682 as enhancers. Promoter and enhancer domains were further subcategorised into four distinct states  
683 according to the active marks H3K4me3 and H3K27ac, and the repressive mark H3K27me3: (i)  
684 inactive, no active and repressive signal detected (H3K4me3<sup>-</sup>, H3K27ac<sup>-</sup>, H3K27me3<sup>-</sup>); (ii) poised,  
685 no active mark but repressive signal detected (H3K4me3<sup>-</sup>, H3K27ac<sup>-</sup>, H3K27me3<sup>+</sup>); (iii) active, only  
686 active mark detected (H3K4me3<sup>+</sup> and/or H3K27ac<sup>+</sup>, H3K27me3<sup>-</sup>); and (iv) bivalent, both active and  
687 repressive marks detected (H3K4me3<sup>+</sup> and/or H3K27ac<sup>+</sup>, H3K27me3<sup>+</sup>).

### 688 **Chromatin landscape at TSS positions**

689 Normalized ChIP-seq signal was averaged for each histone modification from -2.5 to +2.5 kb  
690 surrounding the TSS of all genes, DE genes and randomly selected genes. To further investigate the  
691 increased enrichment of H3K27me3 mark, the 4,298 DE genes were filtered based on three criteria:

692 (i) gene located on one single chromosome with a minimum size of 20 kb; (ii) gene body length of at  
693 least 1 kb; and (iii) -10/+10-kb regions around TSS within the chromosome borders. The resulting  
694 list was composed of 3,070 DE genes. The same criteria were applied to the randomly selected genes  
695 giving rise to a set of 3,080 random genes. 10-kb regions surrounding each TSS were retrieved and  
696 split into 100 intervals of 200 bp. For the genes having multiple transcripts with distinct TSS  
697 positions, the most upstream TSS was selected. Regulatory domains contained in each 200-bp interval  
698 were recovered in order to identify the most dominant domain per interval. Intervals marked with  
699 active and bivalent promoters were plotted in blue and red, respectively.

### 700 **Transcription factor peak calling**

701 Quality of the TF ChIP-seq data was evaluated following the ENCODE consortium guidelines and  
702 metrics (Additional file 3: Table S5) [80]. Peaks were called by using MACS2 v2.1.0.20140616 [77]  
703 with low-stringency parameters to obtain a significant list of peaks (--bw 130/135, as determined by  
704 the cross-correlation analysis; -g 1.0e9; --to-large; -p 0.025). Irreproducible discovery rate (IDR)  
705 analysis was performed on the top 125,000 peaks according to their p-value [80] (parameters:  
706 peak.half.width -1; min.overlap.ratio 0; is.broadpeak F; ranking.measure p.value). The final set of  
707 TFBS was determined by selecting the number of peaks with an IDR threshold below 0.01 obtained  
708 from the pooled-replicate consistency analysis.

### 709 **Transcription factor occupancy**

710 TFBS locations were intersected with regulatory domains and gene features by using BEDtools  
711 intersect v2.24.0 [79]. Summits of TFBS located within promoters and enhancers were retrieved and  
712 extended  $\pm$  250 bp. Extended summits were then merged by using BEDtools merge v2.24.0 [79].  
713 Merged regions bound by at least two different TFs were further investigated to measure the genome-  
714 wide shared occupancy level between each TF pair. For each TF, the number of binding locations  
715 that intersected each of the four remaining TFs were counted separately and compared to its total  
716 number of shared binding locations. A similar approach was applied when analysing the shared

717 occupancy level of the TFs in the vicinity of their target genes, albeit only the binding locations of  
718 the TFs directly regulating them were considered.

### 719 **Binding motif analysis**

720 Motif analysis was performed by using DREME v4.11.2 [81] (default parameters) on the 150-bp  
721 sequences surrounding the summits ( $\pm 75$  bp) of the 1,000 most significant TF peaks that overlapped  
722 with promoters and enhancers. Recognition motifs thus identified were then compared against motif  
723 databases by using Tomtom v4.11.2 [82] (default parameters).

### 724 **Transcriptional regulatory network**

725 The regulatory network was built on the 189 DE genes that were regulated by at least one TF and  
726 associated with the selected signalling pathways using Cytoscape v3.4.0 and the edge-weighted  
727 spring-embedded layout [83]. The five TFs were determined as source nodes, while the DE genes  
728 were defined as target nodes. Interactions between each source node and its target nodes were marked  
729 as direct or indirect whether the differential expression was associated with a functional TFBS or not,  
730 respectively.

731 **Declarations**

732 **Ethics approval and consent to participate:** not applicable.

733 **Consent for publication:** not applicable.

734 **Availability of data and material:** Sequencing data have been deposited on the Gene Expression  
735 Omnibus (GEO) database under the SuperSeries accession number GSE100517.

736 **Competing interests:** The authors declare that they have no competing interests.

737 **Funding:** This work was funded by the Deutsche Forschungsgemeinschaft (DFG; grant GK1631),  
738 the Université Franco-Allemande (UFA/DFH; grants CDFA-06-11 and CT-24-16), the Association  
739 Française contre les Myopathies (AFM; grants 16826 and 18626), the Fondation pour la Recherche  
740 Médicale (FRM; grant DEQ20140329500), the INSERM and the CNRS. MO was part of the  
741 MyoGrad International Research Training Group for Myology and received financial support from  
742 the FRM (grant FDT20150532272).

743 **Authors' contributions:** MO, DD and SS designed and conceived the study. MO, MM, GL, SN and  
744 MAB performed the experiments and collected the data. MO, MM, GL, SN, MAB, DD and SS  
745 analysed the data. STB and BT performed and supervised the RNA-seq procedure. JH performed and  
746 supervised the ChIP-seq procedure. MO, DD and SS interpreted the data. MO, DD and SS wrote the  
747 manuscript, with comments and approval from all authors.

748 **Acknowledgements:** We are grateful to Stefan Mundlos (Charité Universitätsmedizin and Max  
749 Planck Institute for Molecular Genetics, Berlin, Germany) for generously sharing resources. We are  
750 thankful to the Sequencing Core Facility of the Max Planck Institute for Molecular Genetics for  
751 processing the RNA-seq. We are thankful to the Next Generation Sequencing Core Unit of the Berlin-  
752 Brandenburg Center for Regenerative Therapies for processing the ChIP-seq. We thank Peter Hansen  
753 and Peter N. Robinson (Charité Universitätsmedizin, BCRT, Berlin, Germany), as well as Marius van  
754 den Beek and Christophe Antoniewski (Institut de Biologie Paris-Seine, ARTbio, Paris, France) for

755 providing access to Galaxy web servers. We thank Sophie Gournet (Institut de Biologie Paris-Seine,  
756 Paris, France) for illustrations.

## 757 **References**

- 758 1. Heinz S, Romanoski CE, Benner C, Glass CK. The selection and function of cell type-specific  
759 enhancers. *Nat Rev Mol Cell Biol.* 2015;16:144–54.
- 760 2. Spitz F, Furlong EEM. Transcription factors: from enhancer binding to developmental control.  
761 *Nat. Rev. Genet.* 2012;13:613–26.
- 762 3. Nassari S, Duprez D, Fournier-Thibault C. Non-myogenic contribution to muscle development  
763 and homeostasis: the role of connective tissues. *Front. Cell Dev. Biol.* 2017;5:22.
- 764 4. Kalluri R. The biology and function of fibroblasts in cancer. *Nat. Rev. Cancer.* 2016;16:582–98.
- 765 5. Chevallier A, Kieny M, Mauger A. Limb-somite relationship: origin of the limb musculature. *J.*  
766 *Embryol. Exp. Morphol.* 1977;41:245–58.
- 767 6. Christ B, Jacob HJ, Jacob M. Experimental analysis of the origin of the wing musculature in  
768 avian embryos. *Anat. Embryol. (Berl).* 1977;150:171–86.
- 769 7. Gaut L, Duprez D. Tendon development and diseases. *Wiley Interdiscip. Rev. Dev. Biol.*  
770 2016;5:5–23.
- 771 8. Kardon G. Muscle and tendon morphogenesis in the avian hind limb. *Development.*  
772 1998;125:4019–32.
- 773 9. Lance-Jones C, Dias M. The influence of presumptive limb connective tissue on motoneuron  
774 axon guidance. *Dev. Biol.* 1991;143:93–110.
- 775 10. Michaud JL, Lapointe F, Le Douarin NM. The dorsoventral polarity of the presumptive limb is  
776 determined by signals produced by the somites and by the lateral somatopleure. *Development.*  
777 1997;124:1453–63.
- 778 11. Kronenberg HM. Developmental regulation of the growth plate. *Nature.* 2003;423:332–6.
- 779 12. Braun T, Gautel M. Transcriptional mechanisms regulating skeletal muscle differentiation,  
780 growth and homeostasis. *Nat. Rev. Mol. Cell Biol.* 2011;12:349–61.



- 781 13. Huang AH, Lu HH, Schweitzer R. Molecular regulation of tendon cell fate during development.  
782 J. Orthop. Res. 2015;33:800–12.
- 783 14. Murchison ND, Price BA, Conner DA, Keene DR, Olson EN, Tabin CJ, et al. Regulation of  
784 tendon differentiation by scleraxis distinguishes force-transmitting tendons from muscle-anchoring  
785 tendons. Development. 2007;134:2697–708.
- 786 15. Schweitzer R, Chyung JH, Murtaugh LC, Brent AE, Rosen V, Olson EN, et al. Analysis of the  
787 tendon cell fate using Scleraxis, a specific marker for tendons and ligaments. Development.  
788 2001;128:3855–66.
- 789 16. Lejard V, Blais F, Guerquin MJ, Bonnet A, Bonnin MA, Havis E, et al. EGR1 and EGR2  
790 involvement in vertebrate tendon differentiation. J. Biol. Chem. 2011;286:5855–67.
- 791 17. Guerquin MJ, Charvet B, Nourissat G, Havis E, Ronsin O, Bonnin MA, et al. Transcription  
792 factor EGR1 directs tendon differentiation and promotes tendon repair. J. Clin. Invest.  
793 2013;123:3564–76.
- 794 18. Hasson P, DeLaurier A, Bennett M, Grigorieva E, Naiche LA, Papaioannou VE, et al. Tbx4 and  
795 Tbx5 acting in connective tissue are required for limb muscle and tendon patterning. Dev. Cell.  
796 2010;18:148–56.
- 797 19. Kardon G, Harfe BD, Tabin CJ. A Tcf4-positive mesodermal population provides a prepattern  
798 for vertebrate limb muscle patterning. Dev. Cell. 2003;5:937–44.
- 799 20. Stricker S, Brieske N, Haupt J, Mundlos S. Comparative expression pattern of Odd-skipped  
800 related genes *Osr1* and *Osr2* in chick embryonic development. Gene Expr. Patterns. 2006;6:826–34.
- 801 21. Stricker S, Mathia S, Haupt J, Seemann P, Meier J, Mundlos S. Odd-skipped related genes  
802 regulate differentiation of embryonic limb mesenchyme and bone marrow mesenchymal stromal  
803 cells. Stem Cells Dev. 2012;21:623–33.
- 804 22. Ahrens PB, Solursh M, Reiter RS, Singley CT. Position-related capacity for differentiation of

- 805 limb mesenchyme in cell culture. *Dev. Biol.* 1979;69:436–50.
- 806 23. Kim TK, Shiekhattar R. Architectural and functional commonalities between enhancers and  
807 promoters. *Cell.* 2015;162:948–59.
- 808 24. Mikkelsen TS, Ku M, Jaffe DB, Issac B, Lieberman E, Giannoukos G, et al. Genome-wide  
809 maps of chromatin state in pluripotent and lineage-committed cells. *Nature.* 2007;448:553–60.
- 810 25. Hong SH, Rampalli S, Lee JB, McNicol J, Collins T, Draper JS, et al. Cell fate potential of  
811 human pluripotent stem cells is encoded by histone modifications. *Cell Stem Cell.* 2011;9:24–36.
- 812 26. Badis G, Berger MF, Philippakis AA, Talukder S, Gehrke AR, Jaeger SA, et al. Diversity and  
813 complexity in DNA recognition by transcription factors. *Science.* 2009;324:1720–3.
- 814 27. Meng X, Brodsky MH, Wolfe SA. A bacterial one-hybrid system for determining the DNA-  
815 binding specificity of transcription factors. *Nat. Biotechnol.* 2005;23:988–94.
- 816 28. Chen X, Xu H, Yuan P, Fang F, Huss M, Vega VB, et al. Integration of external signaling  
817 pathways with the core transcriptional network in embryonic stem cells. *Cell.* 2008;133:1106–17.
- 818 29. Sunadome K, Yamamoto T, Ebisuya M, Kondoh K, Sehara-Fujisawa A, Nishida E. ERK5  
819 regulates muscle cell fusion through Klf transcription factors. *Dev. Cell.* 2011;20:192–205.
- 820 30. Serafini T, Colamarino SA, Leonardo ED, Wang H, Beddington R, Skarnes WC, et al. Netrin-1  
821 is required for commissural axon guidance in the developing vertebrate nervous system. *Cell.*  
822 1996;87:1001–14.
- 823 31. Dominici C, Moreno-Bravo JA, Puiggros SR, Rappeneau Q, Rama N, Vieugue P, et al. Floor-  
824 plate-derived netrin-1 is dispensable for commissural axon guidance. *Nature.* 2017;545:350–4.
- 825 32. Gao B. Wnt regulation of planar cell polarity (PCP). *Curr. Top. Dev. Biol.* 2012;101:263–95.
- 826 33. Gros J, Serralbo O, Marcelle C. WNT11 acts as a directional cue to organize the elongation of  
827 early muscle fibres. *Nature.* 2009;457:589–93.
- 828 34. Settle SH, Rountree RB, Sinha A, Thacker A, Higgins K, Kingsley DM. Multiple joint and

- 829 skeletal patterning defects caused by single and double mutations in the mouse *Gdf6* and *Gdf5*  
830 genes. *Dev. Biol.* 2003;254:116–30.
- 831 35. DiRocco DP, Kobayashi A, Taketo MM, McMahon AP, Humphreys BD. *Wnt4*/ $\beta$ -catenin  
832 signaling in medullary kidney myofibroblasts. *J. Am. Soc. Nephrol.* 2013;24:1399–412.
- 833 36. Liang XH, Deng WB, Li M, Zhao ZA, Wang TS, Feng XH, et al. *Egr1* protein acts downstream  
834 of estrogen-leukemia inhibitory factor (LIF)-STAT3 pathway and plays a role during implantation  
835 through targeting *Wnt4*. *J. Biol. Chem.* 2014;289:23534–45.
- 836 37. Laeremans H, Rensen SS, Ottenheijm HCJ, Smits JFM, Blankesteyn WM. *Wnt/frizzled*  
837 signalling modulates the migration and differentiation of immortalized cardiac fibroblasts.  
838 *Cardiovasc. Res.* 2010;87:514–23.
- 839 38. Howley BV, Hussey GS, Link LA, Howe PH. Translational regulation of inhibin  $\beta$ A by TGF $\beta$   
840 via the RNA-binding protein hnRNP E1 enhances the invasiveness of epithelial-to-mesenchymal  
841 transitioned cells. *Oncogene.* 2016;35:1725–35.
- 842 39. Apte SS. A disintegrin-like and metalloprotease (reprolysin-type) with thrombospondin type 1  
843 motif (ADAMTS) superfamily: functions and mechanisms. *J. Biol. Chem.* 2009;284:31493–7.
- 844 40. Wei J, Liu C, Li Z. ADAMTS-18: a metalloproteinase with multiple functions. *Front. Biosci.*  
845 (Landmark Ed). 2014;19:1456–67.
- 846 41. Mouw JK, Ou G, Weaver VM. Extracellular matrix assembly: a multiscale deconstruction. *Nat.*  
847 *Rev. Mol. Cell Biol.* 2014;15:771–85.
- 848 42. Fernandes RJ, Schmid TM, Eyre DR. Assembly of collagen types II, IX and XI into nascent  
849 hetero-fibrils by a rat chondrocyte cell line. *Eur. J. Biochem.* 2003;270:3243–50.
- 850 43. de Laat W, Duboule D. Topology of mammalian developmental enhancers and their regulatory  
851 landscapes. *Nature.* 2013;502:499–506.
- 852 44. Cirulli V, Yebra M. Netrins: beyond the brain. *Nat. Rev. Mol. Cell Biol.* 2007;8:296–306.

- 853 45. Xu F, Liu C, Zhou D, Zhang L. TGF- $\beta$ /SMAD pathway and its regulation in hepatic fibrosis. *J.*  
854 *Histochem. Cytochem.* 2016;64:157–67.
- 855 46. Hu B, Phan SH. Notch in fibrosis and as a target of anti-fibrotic therapy. *Pharmacol. Res.*  
856 2016;108:57–64.
- 857 47. Gao Y, Lan Y, Liu H, Jiang R. The zinc finger transcription factors Osr1 and Osr2 control  
858 synovial joint formation. *Dev. Biol.* 2011;352:83–91.
- 859 48. Havis E, Bonnin MA, Olivera-Martinez I, Nazaret N, Ruggiu M, Weibel J, et al. Transcriptomic  
860 analysis of mouse limb tendon cells during development. *Development.* 2014;141:3683–96.
- 861 49. Wang H, Noulet F, Edom-Vovard F, Le Grand F, Duprez D. Bmp signaling at the tips of  
862 skeletal muscles regulates the number of fetal muscle progenitors and satellite cells during  
863 development. *Dev. Cell.* 2010;18:643–54.
- 864 50. Ghosh AK, Quaggin SE, Vaughan DE. Molecular basis of organ fibrosis: potential therapeutic  
865 approaches. *Exp. Biol. Med.* 2013;238:461–81.
- 866 51. Jiang J, Chan YS, Loh YH, Cai J, Tong GQ, Lim CA, et al. A core Klf circuitry regulates self-  
867 renewal of embryonic stem cells. *Nat. Cell Biol.* 2008;10:353–60.
- 868 52. Mienaltowski MJ, Adams SM, Birk DE. Tendon proper- and peritenon-derived progenitor cells  
869 have unique tenogenic properties. *Stem Cell Res. Ther.* 2014;5:86.
- 870 53. Charras G, Sahai E. Physical influences of the extracellular environment on cell migration. *Nat.*  
871 *Rev. Mol. Cell Biol.* 2014;15:813–24.
- 872 54. Rozario T, DeSimone DW. The extracellular matrix in development and morphogenesis: A  
873 dynamic view. *Dev. Biol.* 2010;341:126–40.
- 874 55. Eichmann A, Le Noble F, Autiero M, Carmeliet P. Guidance of vascular and neural network  
875 formation. *Curr. Opin. Neurobiol.* 2005;15:108–15.
- 876 56. Thorsteinsdóttir S, Deries M, Cachaço AS, Bajanca F. The extracellular matrix dimension of

- 877 skeletal muscle development. *Dev. Biol.* 2011;354:191–207.
- 878 57. Ibrahim DM, Hansen P, Rödelsperger C, Stiege AC, Doelken SC, Horn D, et al. Distinct global  
879 shifts in genomic binding profiles of limb malformation-associated HOXD13 mutations. *Genome*  
880 *Res.* 2013;23:2091–102.
- 881 58. Solorsh M, Ahrens PB, Reiter RS. A tissue culture analysis of the steps in limb chondrogenesis.  
882 *In Vitro.* 1978;14:51–61.
- 883 59. Schneider CA, Rasband WS, Eliceiri KW. NIH Image to ImageJ: 25 years of image analysis.  
884 *Nat. Methods.* 2012;9:671–5.
- 885 60. Wilkinson DG, Bailes JA, Champion JE, McMahon AP. A molecular analysis of mouse  
886 development from 8 to 10 days post coitum detects changes only in embryonic globin expression.  
887 *Development.* 1987;99:493–500.
- 888 61. Henrique D, Adam J, Myat A, Chitnis A, Lewis J, Ish-Horowicz D. Expression of a Delta  
889 homologue in prospective neurons in the chick. *Nature.* 1995;375:787–90.
- 890 62. Antin PB, Pier M, Sesepasara T, Yatskievych TA, Darnell DK. Embryonic expression of the  
891 chicken Krüppel-like (KLF) transcription factor gene family. *Dev. Dyn.* 2010;239:1879–87.
- 892 63. Pourquoié O, Fan CM, Coltey M, Hirsinger E, Watanabe Y, Bréant C, et al. Lateral and axial  
893 signals involved in avian somite patterning: a role for BMP4. *Cell.* 1996;84:461–71.
- 894 64. Murakami S, Ohki-Hamazaki H, Watanabe K, Ikenaka K, Ono K. Netrin 1 provides a  
895 chemoattractive cue for the ventral migration of GnRH neurons in the chick forebrain. *J. Comp.*  
896 *Neurol.* 2010;518:2019–34.
- 897 65. Livak KJ, Schmittgen TD. Analysis of relative gene expression data using real-time quantitative  
898 PCR and the 2(-Delta Delta C(T)) Method. *Methods.* 2001;25:402–8.
- 899 66. Hillier LW, Miller W, Birney E, Warren W, Hardison RC, Ponting CP, et al. Sequence and  
900 comparative analysis of the chicken genome provide unique perspectives on vertebrate evolution.

- 901 Nature. 2004;432:695–716.
- 902 67. Kim D, Pertea G, Trapnell C, Pimentel H, Kelley R, Salzberg SL. TopHat2: accurate alignment  
903 of transcriptomes in the presence of insertions, deletions and gene fusions. *Genome Biol.*  
904 2013;14:R36.
- 905 68. Orgeur M, Martens M, Börno ST, Timmermann B, Duprez D, Stricker S. A dual transcript-  
906 discovery approach to improve the delimitation of gene features from RNA-seq data in the chicken  
907 model. *bioRxiv.* 2017; doi:<https://doi.org/10.1101/156406>.
- 908 69. Li H, Handsaker B, Wysoker A, Fennell T, Ruan J, Homer N, et al. The Sequence  
909 Alignment/Map format and SAMtools. *Bioinformatics.* 2009;25:2078–9.
- 910 70. Liao Y, Smyth GK, Shi W. featureCounts: an efficient general purpose program for assigning  
911 sequence reads to genomic features. *Bioinformatics.* 2014;30:923–30.
- 912 71. Love MI, Huber W, Anders S. Moderated estimation of fold change and dispersion for RNA-  
913 seq data with DESeq2. *Genome Biol.* 2014;15:550.
- 914 72. Wagner GP, Kin K, Lynch VJ. Measurement of mRNA abundance using RNA-seq data: RPKM  
915 measure is inconsistent among samples. *Theory Biosci.* 2012;131:281–5.
- 916 73. GENE-E. <https://software.broadinstitute.org/GENE-E/>. Accessed 28 Jun 2017.
- 917 74. Mi H, Dong Q, Muruganujan A, Gaudet P, Lewis S, Thomas PD. PANTHER version 7:  
918 improved phylogenetic trees, orthologs and collaboration with the Gene Ontology Consortium.  
919 *Nucleic Acids Res.* 2010;38:D204-10.
- 920 75. FASTX-Toolkit: FASTQ/A short-reads pre-processing tools.  
921 [http://hannonlab.cshl.edu/fastx\\_toolkit/](http://hannonlab.cshl.edu/fastx_toolkit/). Accessed 23 Dec 2016.
- 922 76. Li H, Durbin R. Fast and accurate short read alignment with Burrows-Wheeler transform.  
923 *Bioinformatics.* 2009;25:1754–60.
- 924 77. Zhang Y, Liu T, Meyer CA, Eeckhoute J, Johnson DS, Bernstein BE, et al. Model-based

- 925 analysis of ChIP-Seq (MACS). *Genome Biol.* 2008;9:R137.
- 926 78. Kellis M, Wold B, Snyder MP, Bernstein BE, Kundaje A, Marinov GK, et al. Defining  
927 functional DNA elements in the human genome. *Proc. Natl. Acad. Sci. U. S. A.* 2014;111:6131–8.
- 928 79. Quinlan AR, Hall IM. BEDTools: a flexible suite of utilities for comparing genomic features.  
929 *Bioinformatics.* 2010;26:841–2.
- 930 80. Landt SG, Marinov GK, Kundaje A, Kheradpour P, Pauli F, Batzoglou S, et al. ChIP-seq  
931 guidelines and practices of the ENCODE and modENCODE consortia. *Genome Res.*  
932 2012;22:1813–31.
- 933 81. Bailey TL. DREME: motif discovery in transcription factor ChIP-seq data. *Bioinformatics.*  
934 2011;27:1653–9.
- 935 82. Gupta S, Stamatoyannopoulos JA, Bailey TL, Noble W, Maniatis T, Goodbourn S, et al.  
936 Quantifying similarity between motifs. *Genome Biol.* 2007;8:R24.
- 937 83. Shannon P, Markiel A, Ozier O, Baliga NS, Wang JT, Ramage D, et al. Cytoscape: a software  
938 environment for integrated models of biomolecular interaction networks. *Genome Res.*  
939 2003;13:2498–504.



940 **Figures**

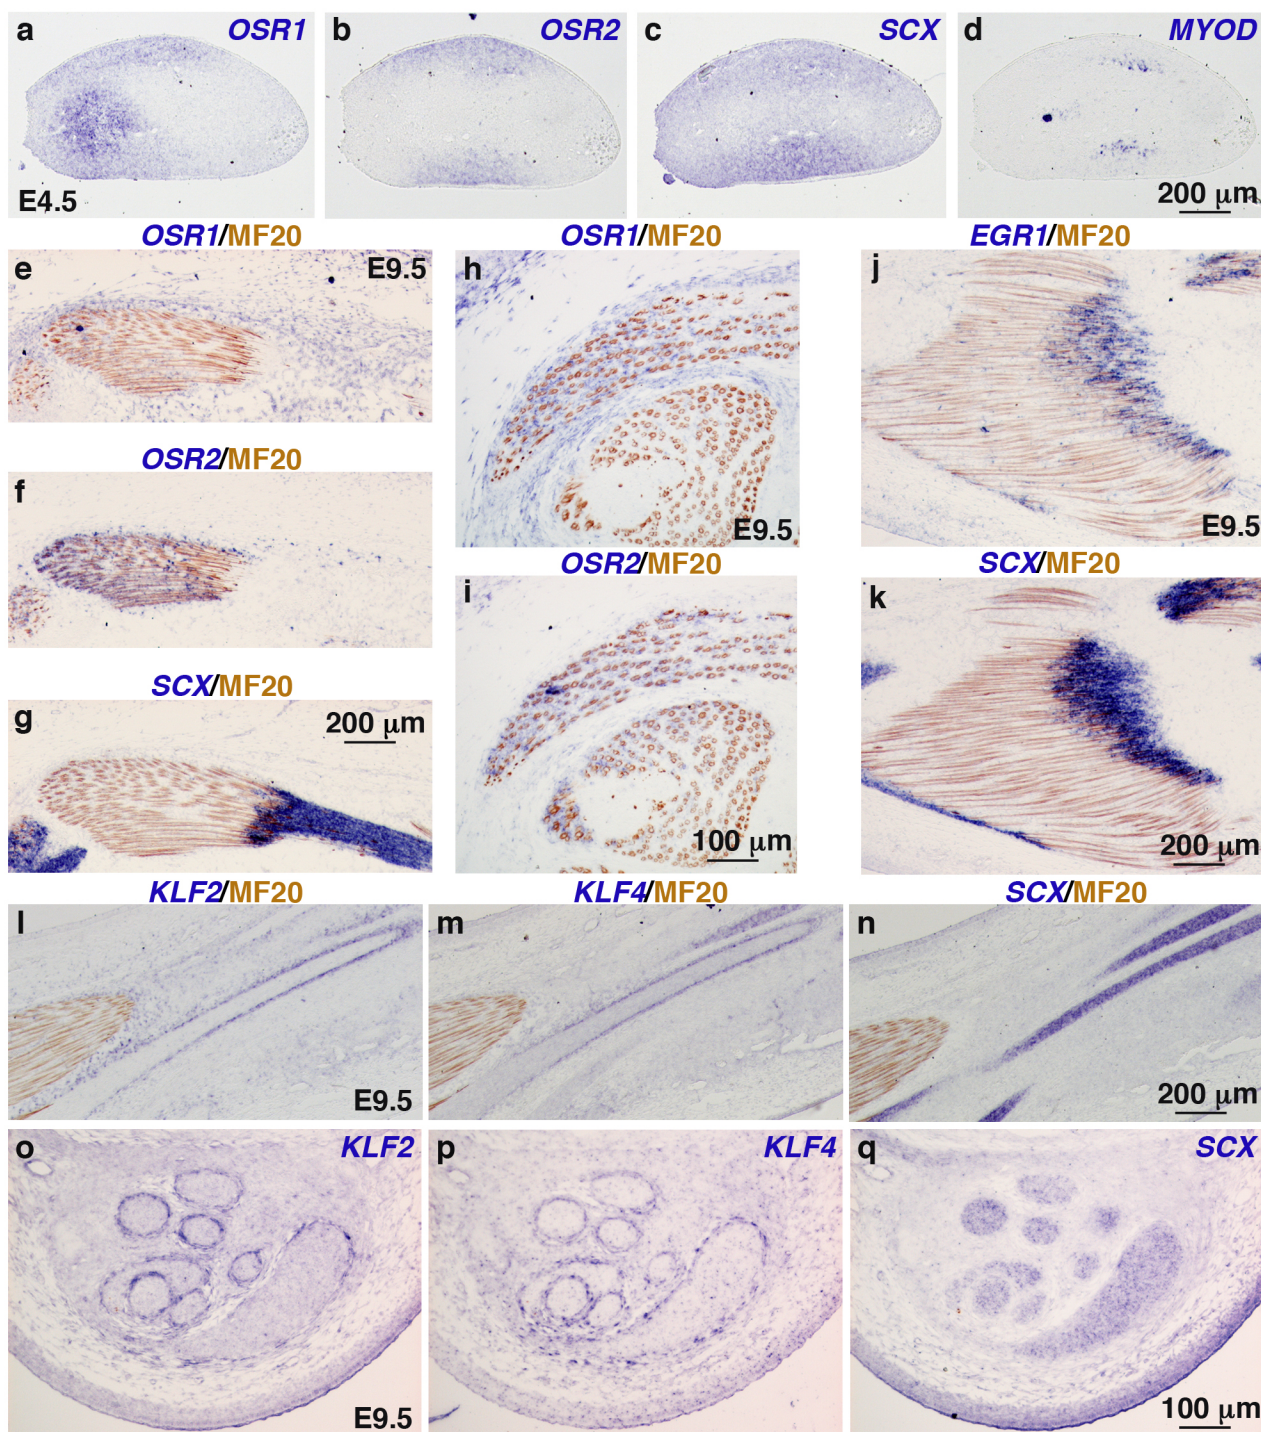

941

942 **Fig. 1** Endogenous expression of CT-associated TFs in hindlimbs of chick embryos. (a-d) In situ  
943 hybridization to hindlimbs of E4.5 chick embryos. Adjacent and transverse limb sections were  
944 hybridized with *OSR1* (a), *OSR2* (b), *SCX* (c) and *MYOD* (d) probes (blue). (e-q) In situ hybridization  
945 to hindlimbs of E9.5 chick embryos followed by immunohistochemistry with the MF20 antibody  
946 (brown), which recognizes skeletal muscle myosins. (e-g) Adjacent and longitudinal limb sections



947 were hybridized with *OSR1* (**e**), *OSR2* (**f**) and *SCX* (**g**) probes (blue). (**h**, **i**) Adjacent and transverse  
948 limb sections were hybridized with *OSR1* (**h**) and *OSR2* (**i**) probes (blue). (**j**, **k**) Adjacent and  
949 longitudinal limb sections were hybridized with *EGR1* (**j**) and *SCX* (**k**) probes (blue). (**l-n**) Adjacent  
950 and longitudinal limb sections were hybridized with *KLF2* (**l**), *KLF4* (**m**) and *SCX* (**n**) probes (blue).  
951 (**o-q**) Adjacent and transverse limb sections were hybridized with *KLF2* (**o**), *KLF4* (**p**) and *SCX* (**q**)  
952 probes (blue).

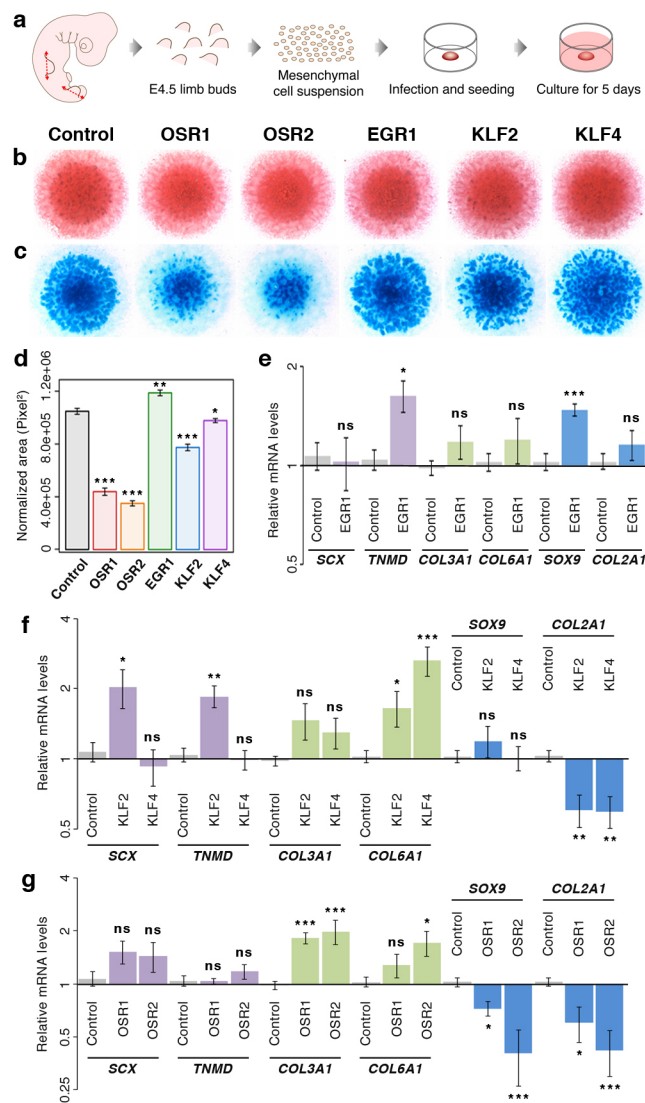

953

954 **Fig. 2** Differentiation of limb mesenchymal cells following TF overexpression. (a) Chick  
 955 mesenchymal cells were isolated from E4.5 limb buds and cultured in high density for five days. (b)  
 956 Eosin staining of TF-overexpressing chMM cultures. (c) Alcian blue staining of cartilage nodules  
 957 formed in TF-overexpressing chMM cultures. (d) Quantification of chondrogenic matrix production:  
 958 mean ± SEM; paired Student's *t*-test: \*, *P* < 0.05; \*\*, *P* < 0.01; \*\*\*, *P* < 0.001. (e-g) Quantitative  
 959 RT-PCR analysis of CT marker gene expression upon overexpression of EGR1 (e), KLF2/KLF4 (f)  
 960 and OSR1/OSR2 (g) in chMM cultures. Graphs depict relative mRNA levels of *SCX* and *TNMD*  
 961 (tendon markers), *COL3A1* and *COL6A1* (irregular CT markers), and *SOX9* and *COL2A1* (cartilage  
 962 markers): mean ± SEM; two-tailed Mann-Whitney U test: ns, non-significant; \*, *P* < 0.05; \*\*, *P* <  
 963 0.01; \*\*\*, *P* < 0.001.

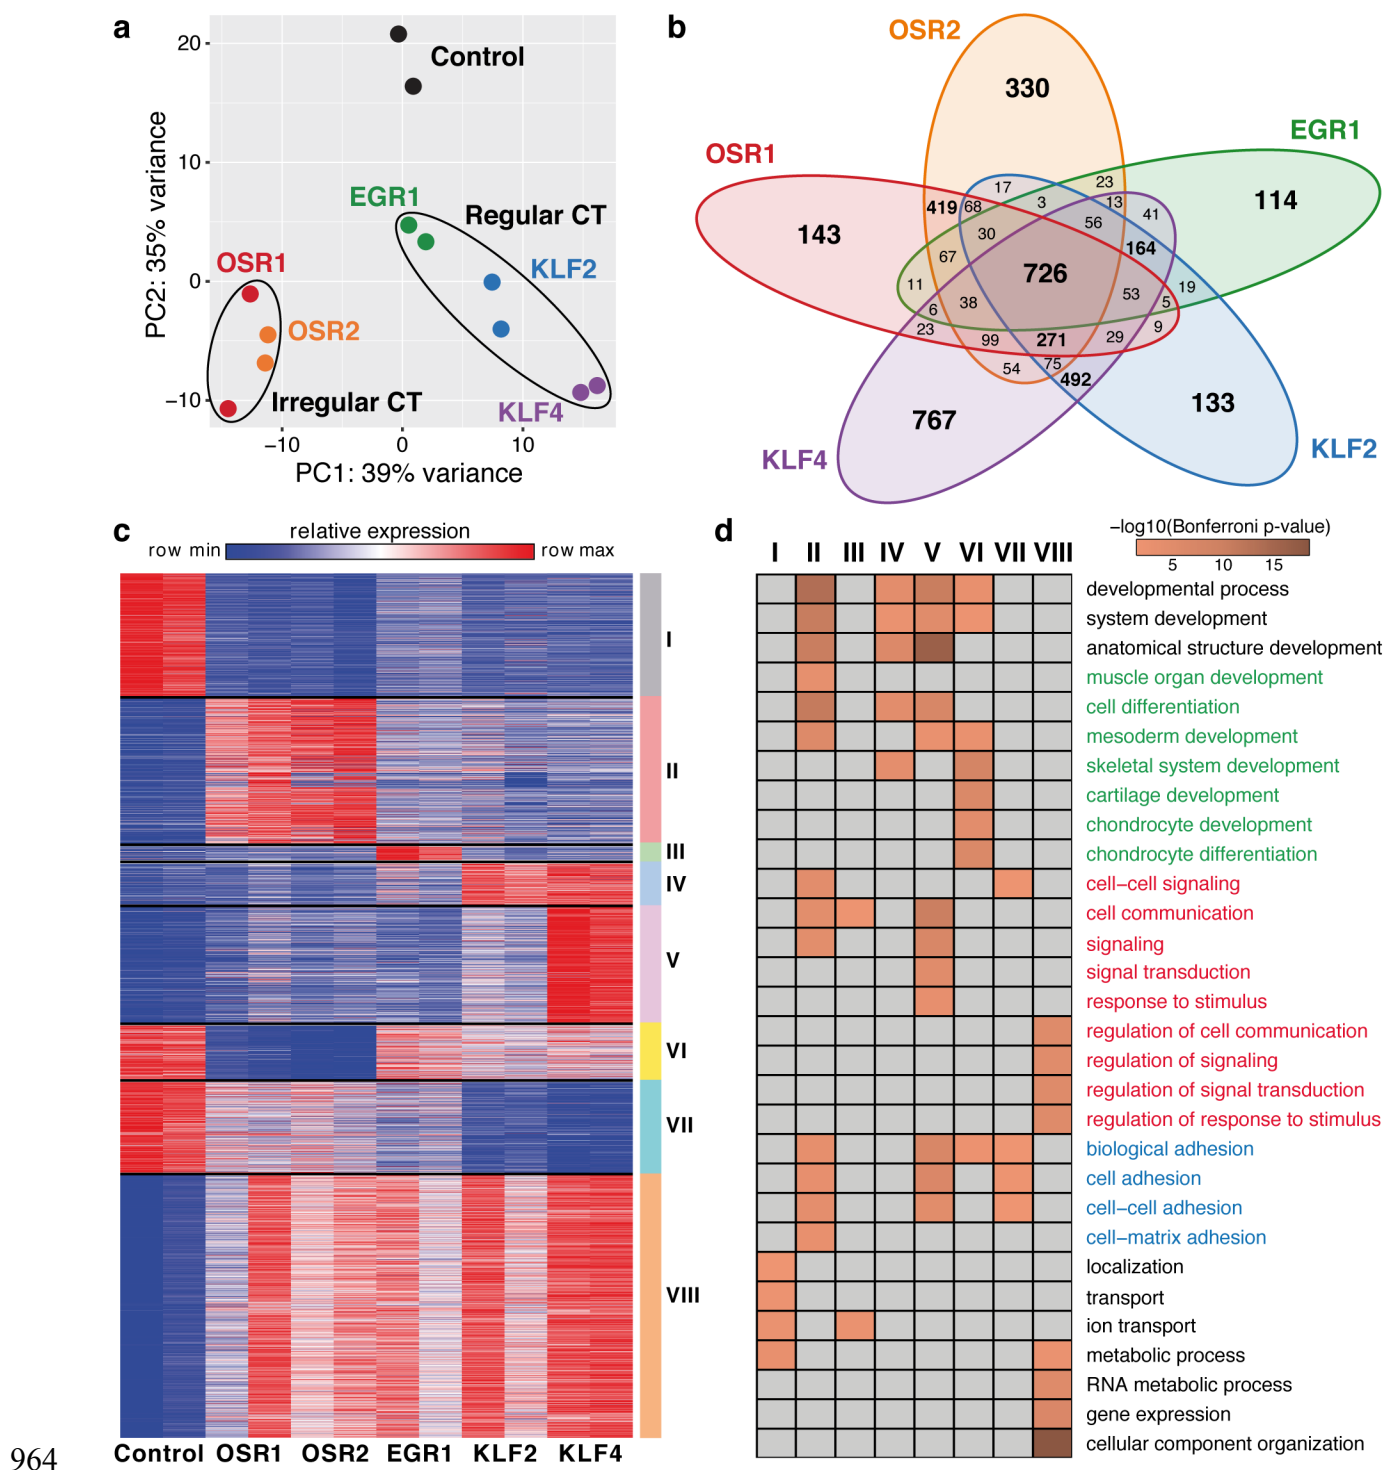

964 **Fig. 3** Gene expression profiles in chMM cultures upon overexpression of CT-associated TFs. **(a)**  
 965 PCA analysis on global gene expression profiles of TF-overexpressing chMM cultures. **(b)** Venn  
 966 diagram of the 4,298 non-redundant DE genes detected across all TF-overexpressing chMM cultures.  
 967 **(c)** Gene clusters identified by *K*-means partitioning on the 4,298 non-redundant DE genes. **(d)** GO  
 968 analysis for biological processes of the DE genes belonging to each *K*-means cluster. GO terms  
 969 related to cell differentiation and development are depicted in green, cell signalling and  
 970

971 communication in red, biological and cell adhesion in blue. Clusters having no significant enrichment  
972 for the specified GO terms are depicted in grey.

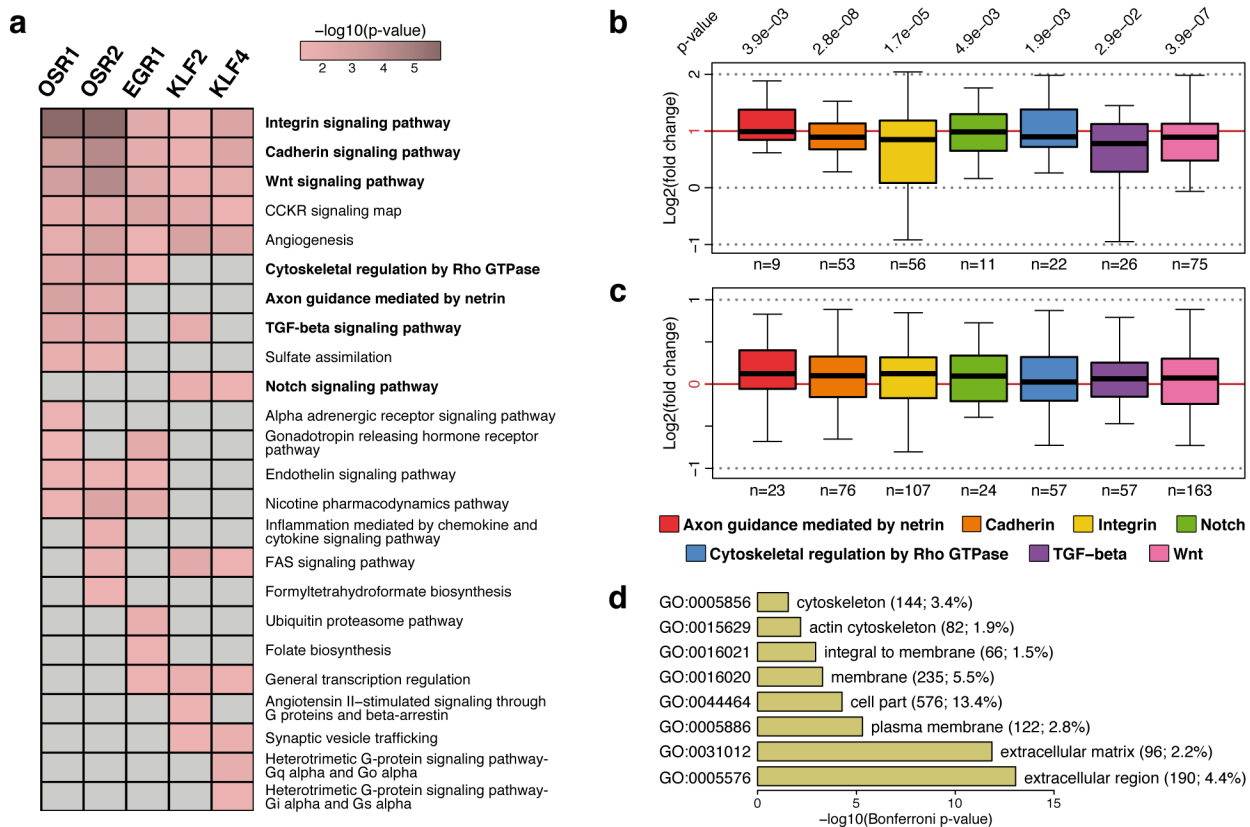

973

974 **Fig. 4** Signalling signature enrichment analysis of DE genes. **(a)** Panther pathways overrepresented  
 975 within the DE genes detected upon overexpression of each TF in chMM cultures. DE genes having  
 976 no enrichment for the specified Panther pathway are depicted in grey. **(b, c)** Global expression levels  
 977 of DE genes **(b)** and non-DE genes **(c)** belonging to the selected Panther pathways. Log2 fold changes  
 978 of each gene were averaged across all chMM culture conditions and replicates. Number of genes (n)  
 979 in each Panther pathway is indicated at the bottom of each box. Paired Wilcoxon rank-sum test: p-  
 980 values are indicated at the top of each box. **(d)** Cellular component GO analysis of the 4,298 non-  
 981 redundant DE genes.

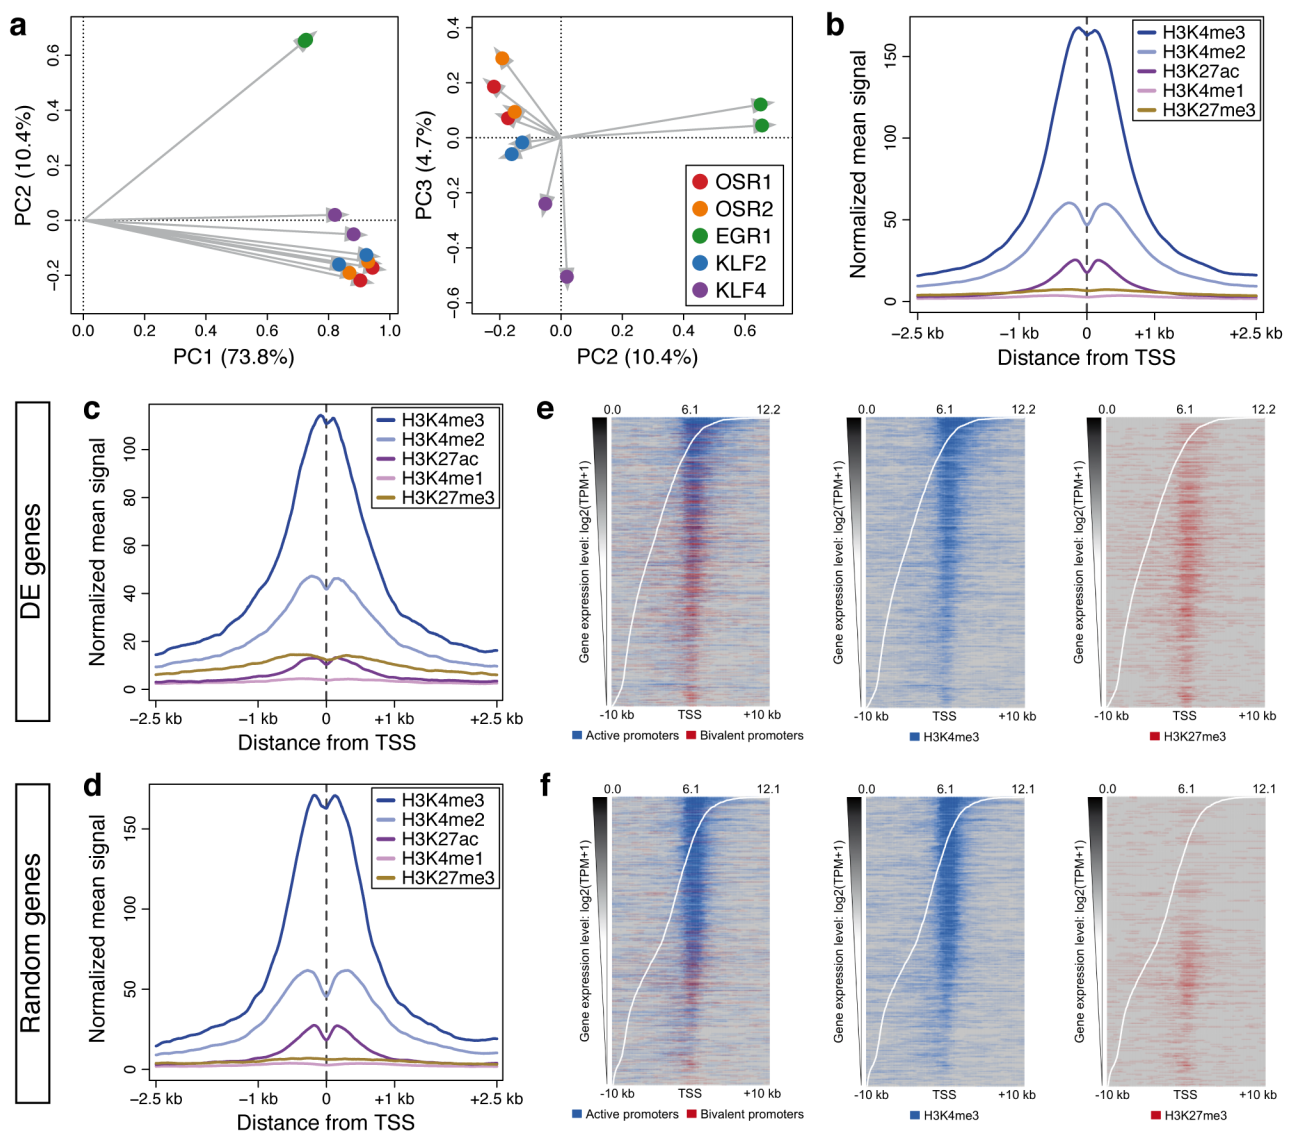

982

983 **Fig. 5** TF binding profiles and chromatin landscape in chMM cultures. **(a)** PCA analysis on the  
 984 normalized ChIP-seq signal profiles of all TFs and biological replicates. **(b-d)** Normalized mean  
 985 histone ChIP-seq signal surrounding the TSS of all genes **(b)**, DE genes **(c)** and randomly selected  
 986 genes **(d)**. **(e, f)** Distribution of active (blue) and bivalent (red) promoter domains at the TSS of DE  
 987 genes **(e)** and randomly selected genes **(f)**. H3K4me3 (blue) signal is present in active and bivalent  
 988 promoter domains, whereas H3K4me3 (red) signal is only detected in bivalent promoter domains.  
 989 Intervals with a main regulatory domain being different from active and bivalent promoter are  
 990 depicted in grey. Genes were ordered according to their expression levels (white curve).

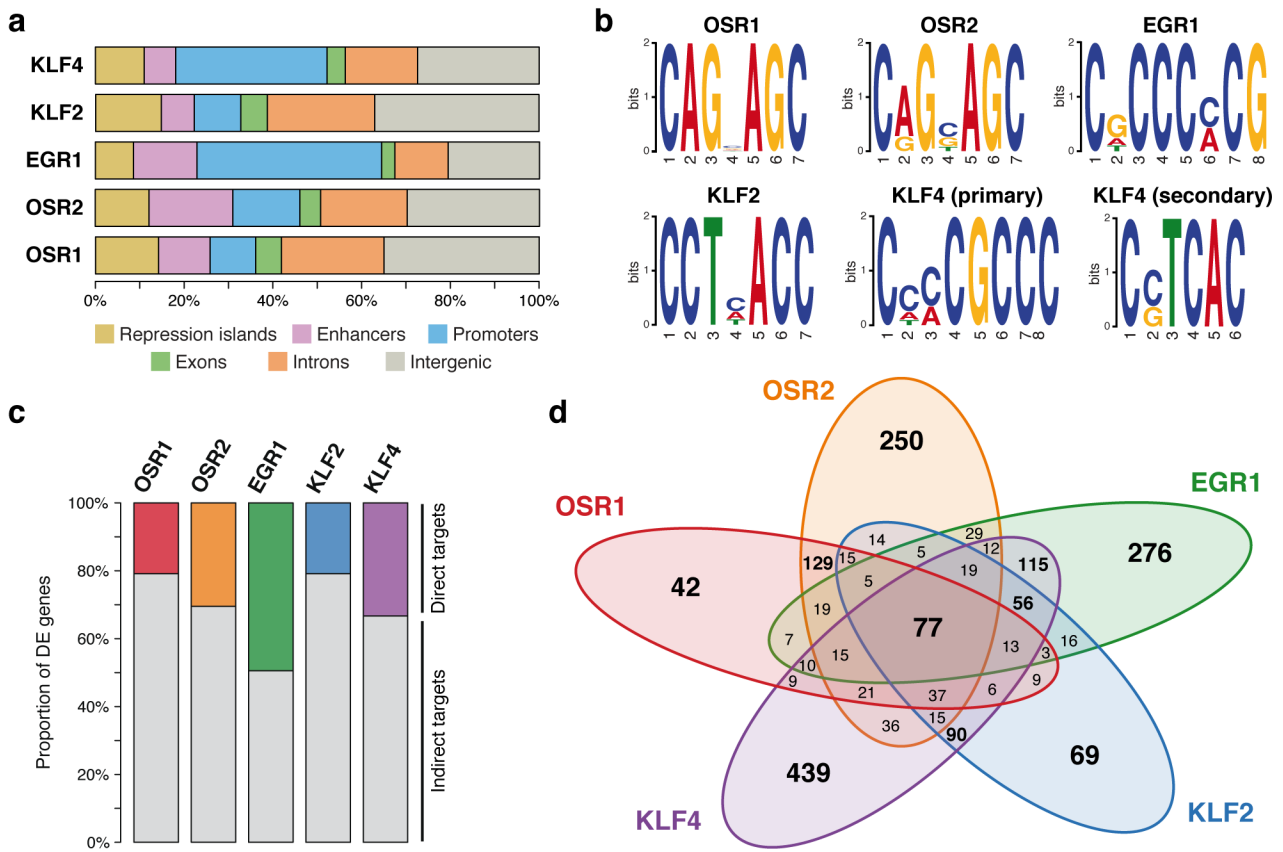



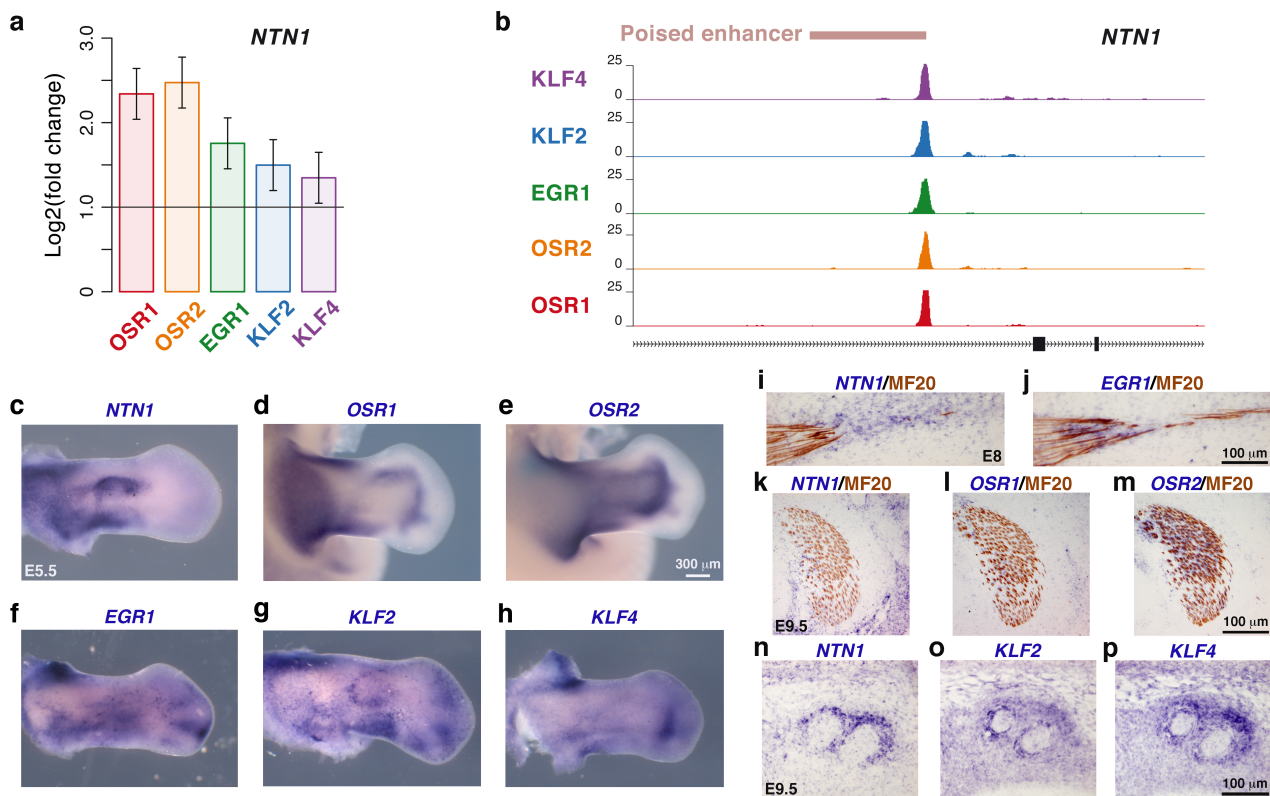

996

997 **Fig. 7** *NTN1* is a common target gene to the five CT-associated TFs. **(a)** *NTN1* expression levels in  
 998 TF-overexpressing chMM cultures determined by RNA-seq. **(b)** Binding site within an intronic  
 999 enhancer of *NTN1* gene for the five TFs identified by ChIP-seq. **(c-h)** Whole-mount in situ  
 1000 hybridization to hindlimbs of E5.5 chick embryos with *NTN1* **(c)**, *OSR1* **(d)**, *OSR2* **(e)**, *EGR1* **(f)**,  
 1001 *KLF2* **(g)** and *KLF4* **(h)** probes (blue). **(i, p)** In situ hybridization to forelimbs of E8 **(i, j)** and E9.5  
 1002 **(k-p)** chick embryos followed by immunohistochemistry with the MF20 antibody (brown). Adjacent  
 1003 and longitudinal limb sections were hybridized with *NTN1* **(i)** and *EGR1* **(j)** probes (blue). Adjacent  
 1004 and transverse limb sections were hybridized with *NTN1* **(k, n)**, *OSR1* **(l)**, *OSR2* **(m)**, *KLF2* **(o)** and  
 1005 *KLF4* **(p)** probes (blue).



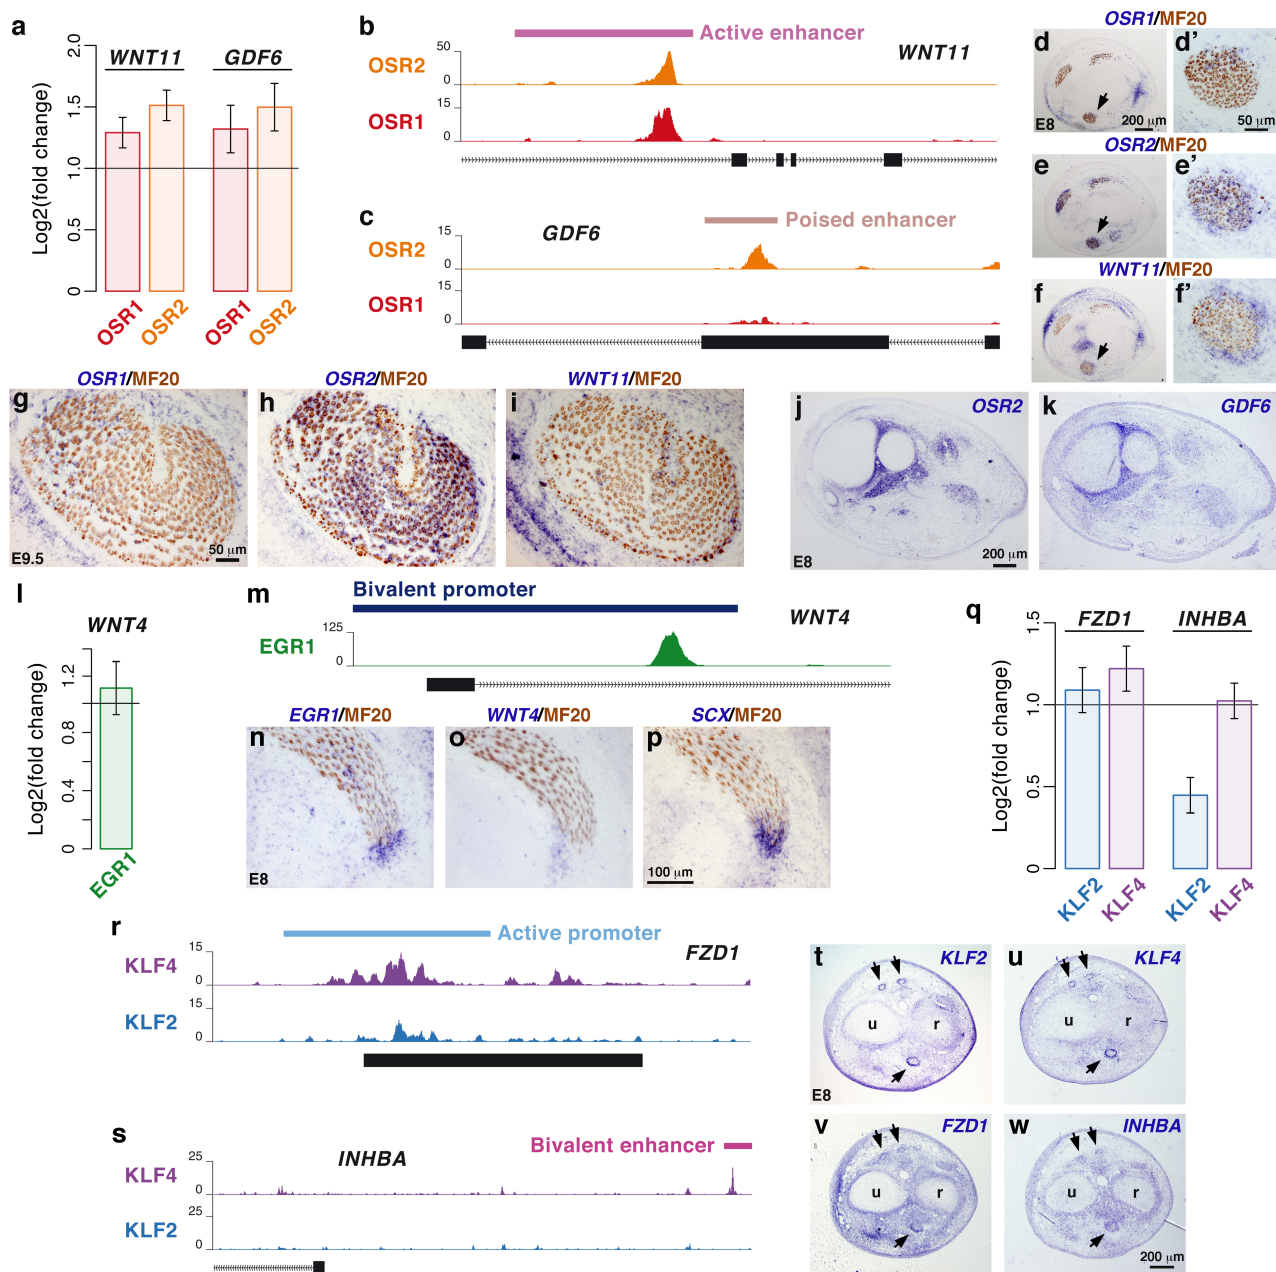

1006

1007 **Fig. 8** Selection of target genes encoding signalling molecules downstream of the five CT-associated  
 1008 TFs. (a) *WNT11* and *GDF6* expression levels in OSR1- and OSR2-overexpressing chMM cultures  
 1009 determined by RNA-seq. (b) Binding site within an intronic enhancer of *WNT11* gene for OSR1 and  
 1010 OSR2 identified by ChIP-seq. (c) Binding site within an exonic enhancer of *GDF6* gene for OSR2  
 1011 identified by ChIP-seq. (d-i) In situ hybridization to forelimbs of E8 (d-f) and E9.5 (g-i) chick  
 1012 embryos followed by immunohistochemistry with the MF20 antibody (brown). Adjacent and  
 1013 transverse limb sections were hybridized with *OSR1* (d, g), *OSR2* (e, h) and *WNT11* (f, i) probes  
 1014 (blue). (d', e', f') are high magnifications of the arrowed muscle in (d, e, f). (j, k) In situ hybridization

1015 to adjacent and transverse forelimb sections of E8 chick embryos with *OSR2* (**j**) and *GDF6* (**k**) probes  
1016 (blue). (**l**) *WNT4* expression levels in EGR1-overexpressing chMM cultures determined by RNA-seq.  
1017 (**m**) Binding site within the promoter of *WNT4* gene for EGR1 identified by ChIP-seq. (**n-p**) In situ  
1018 hybridization to forelimbs of E8 chick embryos followed by immunohistochemistry with the MF20  
1019 antibody (brown). Adjacent and transverse limb sections were hybridized with *EGR1* (**n**), *WNT4* (**o**)  
1020 and *SCX* (**p**) probes (blue). (**q**) *FZD1* and *INHBA* expression levels in KLF2- and KLF4-  
1021 overexpressing chMM cultures determined by RNA-seq. (**r**) Binding site within the promoter of  
1022 *FZD1* gene for KLF2 and KLF4 identified by ChIP-seq. (**s**) Binding site within an enhancer located  
1023 upstream of *INHBA* gene for KLF4 identified by ChIP-seq. (**t-w**) In situ hybridization to adjacent and  
1024 transverse forelimb sections of E8 chick embryos with *KLF2* (**t**), *KLF4* (**u**), *FZD1* (**v**) and *INHBA*  
1025 (**w**) probes (blue).

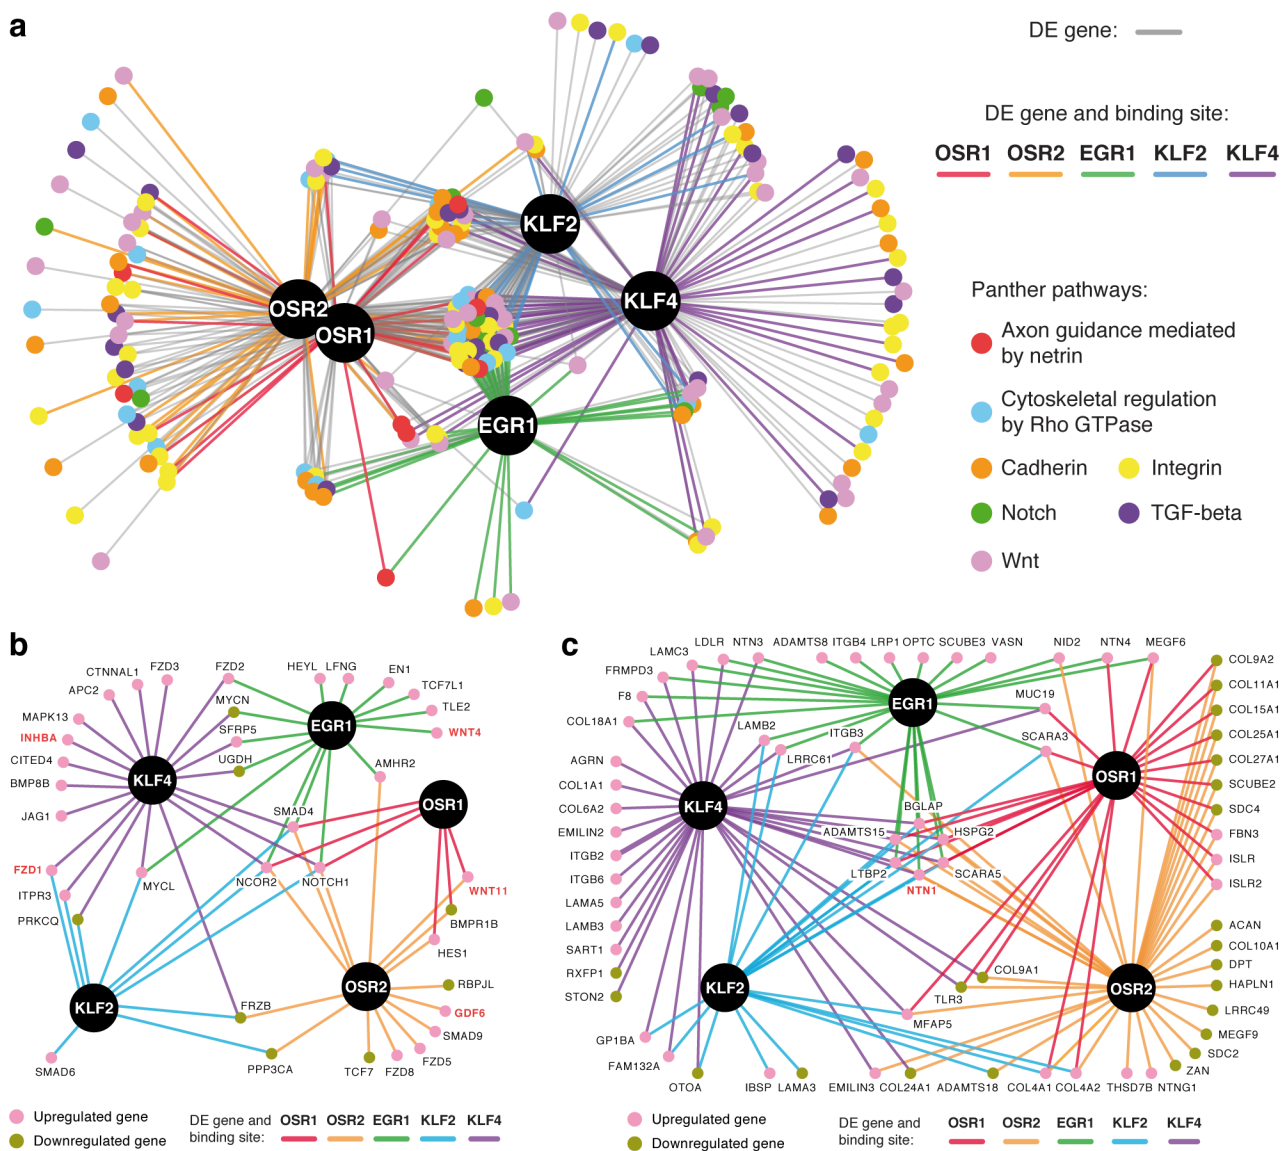

1026

1027

1028

1029

1030

1031

1032

1033

1034

**Fig. 9** Regulatory networks of CT-associated TFs. **(a)** Transcriptional regulatory network of the CT-associated TFs and their target genes related to the indicated signalling pathways. Coloured connections correspond to direct interactions between the TFs and their target genes (DE gene and TFBS), while indirect interactions are depicted in grey (DE gene only). **(b)** Network representation of the 38 target genes associated with the Notch, TGF- $\beta$  and Wnt signalling pathways that are directly regulated by the TFs. **(c)** Network representation of the 70 target genes associated with the ECM that are directly regulated by the TFs. Genes depicted in red correspond to the selected target genes investigated by in situ hybridization.

1035 **Additional files**

1036 **Additional file 1:** Supplementary figures S1-S14. (PDF)

1037 **Additional file 2:** Supplementary table S1 combining RNA-seq and ChIP-seq data. (XLSX)

1038 **Additional file 3:** Supplementary tables S2-S5. (XLSX)
